# Supplementary material for: Iridium–CNP complex catalyzed cross-coupling of primary alcohols and secondary alcohols by a borrowing hydrogen strategy
Source: Royal Society of Chemistry journal article supplement (doi:10.1039/c4ra06474g), 2014-08-29

## Supplementary Information

### **Iridium-CNP complex catalyzed cross-coupling of primary alcohols and secondary alcohols by borrowing hydrogen strategy**

*Dawei Wang,\* Keyan Zhao, Xin Yu, Hongyan Miao and Yuqiang Ding\**

*The Key Laboratory of Food Colloids and Biotechnology, Ministry of Education, School of Chemical and Material Engineering, Jiangnan University, Wuxi 214122, Jiangsu Province, China.*

#### **Table of contents**

|                                                        |        |
|--------------------------------------------------------|--------|
| General information-----                               | S2     |
| Typical procedure for the synthesis of <b>5a</b> ----- | S2     |
| Analytical data for <b>5</b> and <b>7</b> -----        | S2-S6  |
| NMR spectra of the obtained compounds-----             | S7-S27 |

## General information

All the obtained products were characterized by melting points (mp),  $^1\text{H}$  NMR spectra and  $^{13}\text{C}$  NMR spectra. Melting points were measured on an BÜCHER-545 microscopy digital melting point apparatus and are uncorrected; NMR spectra were obtained on Bruker Advance 400 and -300; Chemical shifts were reported in parts per million (ppm,  $\delta$ ) downfield from tetramethylsilane. Proton coupling patterns are described as singlet (s), doublet (d), triplet (t), multiplet (m); TLC was performed using commercially prepared 100-400 mesh silica gel plates (GF<sub>254</sub>), and visualization was effected at 254 nm; All the reagents were purchased from commercial sources (J&KChem, TCI, Fluka, Acros, SCRC), and used without further purification.

### Typical procedure for the synthesis of **5a**.

Catalyst **3b** (2 mol%, 0.02 mmol), benzyl alcohol (1.1 mmol), Phenylethanol (1 mmol), Caesium carbonate (1 mmol), and toluene (2 mL) was added to a Schlenk tube. The mixture was heated under 110 °C for 16 h and then cooled to room temperature. The resulting solution was directly purified by column chromatography with petroleum ether/ethyl acetate (10:1) as eluent to give 1, 3-diphenylpropan-1-one (**5a**) as a white solid (yield: 89%).

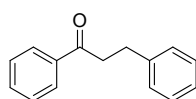

*1, 3-diphenylpropan-1-one (5a)*. Yield 89%;  $^1\text{H}$  NMR (400 MHz,  $\text{CDCl}_3$ )  $\delta$  7.89 (d,  $J = 7.5$  Hz, 2H), 7.48 (t,  $J = 7.8$  Hz, 1H), 7.38 (t,  $J = 7.8$  Hz, 2H), 7.26-7.20 (m, 2H), 7.20-7.17 (m, 2H), 7.13 (t,  $J = 7.0$  Hz, 1H), 3.23 (t,  $J = 5.3$  Hz, 2H), 3.00 (t,  $J = 5.4$  Hz, 2H);  $^{13}\text{C}$  NMR (101 MHz,  $\text{CDCl}_3$ )  $\delta$  199.26, 141.31, 136.89, 133.07, 128.76-128.34 (m), 128.06, 126.15, 40.46, 30.15, 29.71.

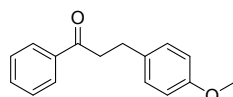

*3-(4-methoxyphenyl)-1-phenylpropan-1-one (5b)*. Yield 97%; white solid; IR (neat):  $^1\text{H}$  NMR (400 MHz,  $\text{CDCl}_3$ )  $\delta$  8.04-7.93 (m, 2H), 7.58 (t,  $J = 7.4$  Hz, 1H), 7.48 (t,  $J = 7.6$  Hz, 2H), 7.20 (d,  $J = 8.6$  Hz, 2H), 6.91-6.84 (m, 2H), 3.81 (s, 3H), 3.33-3.26 (m, 2H), 3.10-2.99 (m, 2H).

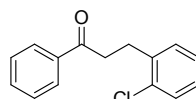

*3-(2-chlorophenyl)-1-phenylpropan-1-one (5c)*. Yield 81%;  $^1\text{H}$  NMR (400 MHz,  $\text{CDCl}_3$ )  $\delta$  8.03-7.97 (m, 2H), 7.62-7.56 (m, 1H), 7.48 (t,  $J = 7.6$  Hz, 2H), 7.39 (dd,  $J = 7.5$ , 1.7 Hz, 1H), 7.34 (dd,  $J = 7.2$ , 1.9 Hz, 1H), 7.21 (pd,  $J = 7.3$ , 1.7 Hz, 2H), 3.38-3.31 (m, 2H), 3.25-3.17 (m, 2H).

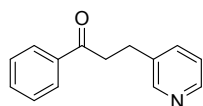

*1-phenyl-3-(pyridin-3-yl)propan-1-one (5d)*. Yield 85%;  $^1\text{H}$  NMR (400 MHz,  $\text{CDCl}_3$ )  $\delta$  8.54 (s, 1H), 8.46 (d,  $J = 3.8$  Hz, 1H), 8.01-7.92 (m, 2H), 7.63-7.54 (m, 2H), 7.47 (t,  $J = 7.6$  Hz, 2H), 7.23 (dd,  $J = 7.7, 4.9$  Hz, 1H), 3.33 (dd,  $J = 7.4$  Hz, 2H), 3.09 (t,  $J = 7.4$  Hz, 2H);  $^{13}\text{C}$  NMR (101 MHz,  $\text{CDCl}_3$ )  $\delta$  198.47, 149.97, 147.69, 136.67, 136.06, 133.27, 128.69, 128.01, 123.39, 39.77, 27.14.

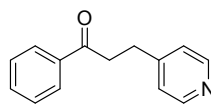

*1-phenyl-3-(pyridin-4-yl)propan-1-one (5e)*. Yield 82%;  $^1\text{H}$  NMR (400 MHz,  $\text{CDCl}_3$ )  $\delta$  8.41 (s, 2H), 7.87 (dd,  $J = 5.2, 3.3$  Hz, 2H), 7.52-7.47 (m, 1H), 7.38 (d,  $J = 8.8$  Hz, 2H), 7.10 (t,  $J = 7.0$  Hz, 2H), 3.30-3.20 (m, 2H), 3.00 (t,  $J = 7.4$  Hz, 2H);  $^{13}\text{C}$  NMR (101 MHz,  $\text{CDCl}_3$ )  $\delta$  198.23, 150.35, 149.79, 136.58, 133.35, 128.72, 128.00, 123.96, 38.85, 29.18.

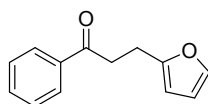

*3-(furan-2-yl)-1-phenylpropan-1-one (5f)*. Yield: 78%;  $^1\text{H}$  NMR (400 MHz,  $\text{CDCl}_3$ )  $\delta$  8.04-7.98 (m, 2H), 7.59 (t,  $J = 7.4$  Hz, 1H), 7.49 (t,  $J = 7.6$  Hz, 2H), 7.33 (t,  $J = 3.3$  Hz, 1H), 6.33-6.28 (m, 1H), 6.08 (d,  $J = 3.1$  Hz, 1H), 3.36 (dd,  $J = 9.2, 5.8$  Hz, 2H), 3.16-3.10 (m, 2H).

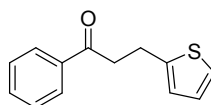

*1-phenyl-3-(thiophen-2-yl)propan-1-one (5g)*. Yield: 74%;  $^1\text{H}$  NMR (400 MHz,  $\text{CDCl}_3$ )  $\delta$  8.00 (d,  $J = 7.3$  Hz, 2H), 7.59 (t,  $J = 7.4$  Hz, 1H), 7.49 (t,  $J = 7.6$  Hz, 2H), 7.15 (d,  $J = 4.2$  Hz, 1H), 6.95 (dd,  $J = 5.0, 3.5$  Hz, 1H), 5.91 (q,  $J = 6.6$  Hz, 1H), 3.43-3.37 (m, 2H), 3.36-3.30 (m, 2H).

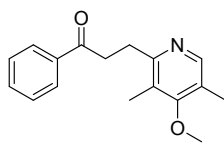

*3-(4-methoxy-3,5-dimethylpyridin-2-yl)-1-phenylpropan-1-one (5h)*. Yield: 69%;  $^1\text{H}$  NMR (400 MHz,  $\text{CDCl}_3$ )  $\delta$  8.13 (s, 1H), 8.03 (d,  $J = 7.2$  Hz, 2H), 7.58-7.52 (m, 1H), 7.45 (d,  $J = 7.6$  Hz, 2H), 3.74 (s, 3H), 3.50 (t,  $J = 7.3$  Hz, 2H), 3.17 (t,  $J = 7.3$  Hz, 2H), 2.28 (s, 3H), 2.21 (s, 3H);  $^{13}\text{C}$  NMR (101 MHz,  $\text{CDCl}_3$ )  $\delta$  199.95, 163.69, 158.55, 148.69, 137.11, 132.91, 128.52, 128.16, 124.28, 123.96, 59.88, 36.69, 28.89, 13.20, 11.16.

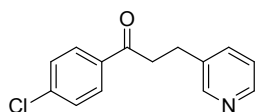

*1-(4-chlorophenyl)-3-(pyridin-3-yl)propan-1-one (5i)*. Yield: 73%;  $^1\text{H}$  NMR (400 MHz,  $\text{CDCl}_3$ )  $\delta$  8.43 (d,  $J = 1.8$  Hz, 1H), 8.40-8.35 (m, 1H), 7.85-7.77 (m, 2H), 7.51-7.48 (m, 1H), 7.38-7.33 (m, 2H), 7.16-7.11 (m, 1H), 3.20 (t,  $J = 7.4$  Hz, 2H), 3.00 (t,  $J = 7.4$  Hz,

2H);  $^{13}\text{C}$  NMR (101 MHz,  $\text{CDCl}_3$ )  $\delta$  197.20, 149.89, 147.71, 139.75, 136.44, 136.09, 134.93, 129.64-128.80 (m), 123.43, 39.73, 27.03.

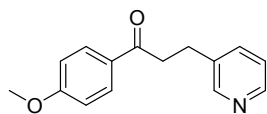

*1-(4-methoxyphenyl)-3-(pyridin-3-yl)propan-1-one (5j)*. Yield: 81%;  $^1\text{H}$  NMR (400 MHz,  $\text{CDCl}_3$ )  $\delta$  8.46 (d,  $J = 1.7$  Hz, 1H), 8.38 (dd,  $J = 4.7, 1.2$  Hz, 1H), 7.91-7.83 (m, 2H), 7.51 (d,  $J = 7.8$  Hz, 1H), 7.14 (dd,  $J = 7.7, 4.8$  Hz, 1H), 6.88-6.83 (m, 2H), 3.19 (t,  $J = 7.5$  Hz, 2H), 3.00 (t,  $J = 7.5$  Hz, 2H);  $^{13}\text{C}$  NMR (101 MHz,  $\text{CDCl}_3$ )  $\delta$  197.02, 163.61, 149.96, 147.62, 136.80, 136.06, 130.28, 129.77, 123.36, 113.81, 55.49, 39.41, 27.31.

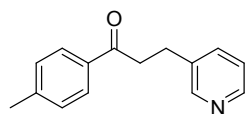

*3-(pyridin-3-yl)-1-(p-tolyl)propan-1-one (5k)*. Yield: 79%;  $^1\text{H}$  NMR (400 MHz,  $\text{CDCl}_3$ )  $\delta$  8.53 (d,  $J = 1.8$  Hz, 1H), 8.45 (dd,  $J = 4.8, 1.4$  Hz, 1H), 7.85 (d,  $J = 8.2$  Hz, 2H), 7.62-7.56 (m, 1H), 7.25 (d,  $J = 8.4$  Hz, 2H), 7.21 (dd,  $J = 7.7, 4.8$  Hz, 1H), 3.29 (t,  $J = 7.5$ , 2H), 3.07 (t,  $J = 7.5$  Hz, 2H), 2.41 (s, 3H);  $^{13}\text{C}$  NMR (101 MHz,  $\text{CDCl}_3$ )  $\delta$  198.17, 149.97, 147.65, 144.13, 136.74, 136.10, 134.15, 129.37, 128.14, 123.40, 39.68, 27.19, 21.68.

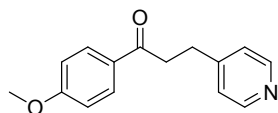

*1-(4-methoxyphenyl)-3-(pyridin-4-yl)propan-1-one (5l)*. Yield: 82%;  $^1\text{H}$  NMR (400 MHz,  $\text{CDCl}_3$ )  $\delta$  8.44 (d,  $J = 5.9$  Hz, 2H), 7.87 (d,  $J = 8.9$  Hz, 2H), 7.12 (d,  $J = 5.8$  Hz, 2H), 6.87 (d,  $J = 8.9$  Hz, 2H), 3.80 (s, 3H), 3.21 (t,  $J = 7.5$  Hz, 2H), 3.00 (t,  $J = 7.5$  Hz, 2H);  $^{13}\text{C}$  NMR (101 MHz,  $\text{CDCl}_3$ )  $\delta$  196.80, 163.65, 150.47, 149.86, 130.30, 129.67, 123.91, 113.83, 55.52, 38.52, 29.35.

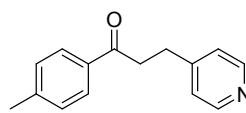

*3-(pyridin-4-yl)-1-(p-tolyl)propan-1-one (5m)*. Yield: 78%;  $^1\text{H}$  NMR (400 MHz,  $\text{CD}_2\text{Cl}_2$ )  $\delta$  8.38 (d,  $J = 4.6$  Hz, 2H), 7.76 (d,  $J = 8.2$  Hz, 2H), 7.19 (d,  $J = 8.0$  Hz, 2H), 7.10 (d,  $J = 5.8$  Hz, 2H), 3.21 (t,  $J = 7.4$  Hz, 2H), 2.95 (t,  $J = 7.4$  Hz, 2H), 2.32 (s, 3H);  $^{13}\text{C}$  NMR (101 MHz,  $\text{CD}_2\text{Cl}_2$ )  $\delta$  197.73, 149.64, 144.16, 134.24, 129.29, 127.97, 38.64, 29.69, 21.34.

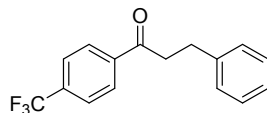

*3-phenyl-1-(4-(trifluoromethyl)phenyl)propan-1-one (5n)* Yield: 58%;  $^1\text{H}$  NMR (400 MHz,  $\text{CDCl}_3$ )  $\delta$  8.08 (d,  $J = 8.2$  Hz, 2H), 7.74 (t,  $J = 7.0$  Hz, 2H), 7.37-7.31 (m, 2H), 7.30-7.28 (m, 2H), 7.27 (s, 1H), 3.39-3.33 (m, 2H), 3.12 (t,  $J = 7.6$  Hz, 2H).

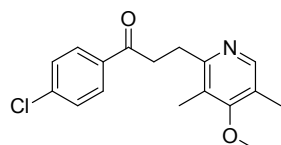

*1-(4-chlorophenyl)-3-(4-methoxy-3,5-dimethylpyridin-2-yl)propan-1-one*

**(5o)**. Yield: 63%;  $^1\text{H}$  NMR (400 MHz,  $\text{CDCl}_3$ )  $\delta$  8.03 (s, 1H), 7.89 (d,  $J = 8.5$  Hz, 2H), 7.35 (d,  $J = 8.5$  Hz, 2H), 3.67 (s, 3H), 3.39 (t,  $J = 7.2$  Hz, 2H), 3.09 (t,  $J = 7.2$  Hz, 2H), 2.20 (s, 3H), 2.14 (s, 3H);  $^{13}\text{C}$  NMR (101 MHz,  $\text{CDCl}_3$ )  $\delta$  196.80, 163.65, 150.47, 149.86, 130.30, 129.67, 123.91, 113.83, 55.52, 38.52, 29.35.

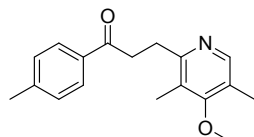

*3-(4-methoxy-3,5-dimethylpyridin-2-yl)-1-(p-tolyl)propan-1-one* (**5p**).

Yield: 73%;  $^1\text{H}$  NMR (400 MHz,  $\text{CDCl}_3$ )  $\delta$  8.06 (s, 1H), 7.85 (d,  $J = 8.1$  Hz, 2H), 7.21-7.14 (m, 2H), 3.67 (s, 3H), 3.39 (t,  $J = 7.4$  Hz, 2H), 3.09 (t,  $J = 7.3$  Hz, 2H), 2.33 (s, 3H), 2.20 (s, 3H), 2.14 (s, 3H);  $^{13}\text{C}$  NMR (101 MHz,  $\text{CDCl}_3$ )  $\delta$  199.56, 163.66, 158.72, 148.72, 143.64, 134.60, 129.20, 128.28, 124.27, 123.92, 59.87, 36.63, 28.98, 21.66, 13.21, 11.16.

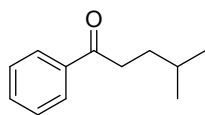

*4-methyl-1-phenylpentan-1-one* (**5q**). Yield: 46%;  $^1\text{H}$  NMR (400 MHz,  $\text{CDCl}_3$ )

$\delta$  8.02-7.96 (m, 2H), 7.58 (t,  $J = 7.3$  Hz, 1H), 7.52-7.46 (m, 2H), 3.05-2.95 (m, 2H), 1.70-1.62 (m, 3H), 1.00-0.93 (m, 6H)

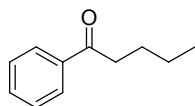

*1-phenylpentan-1-one* (**5r**). Yield: 31%;  $^1\text{H}$  NMR (400 MHz,  $\text{CDCl}_3$ )  $\delta$  8.02-

7.97 (m, 2H), 7.61-7.54 (m, 1H), 7.53-7.44 (m, 2H), 3.00 (t,  $J = 7.4$  Hz, 2H), 1.82-1.68 (m, 2H), 0.97-0.84 (m, 5H);

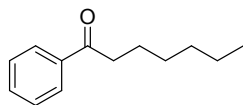

*1-phenylheptan-1-one* (**5s**). Yield: 62%;  $^1\text{H}$  NMR (400 MHz,  $\text{CDCl}_3$ )  $\delta$

8.01-7.96 (m, 2H), 7.57 (t,  $J = 7.3$  Hz, 1H), 7.48 (t,  $J = 7.6$  Hz, 2H), 2.99 (t,  $J = 7.4$  Hz, 2H), 1.80-1.70 (m, 2H), 1.40-1.27 (m, 4H), 0.97-0.86 (m, 5H);

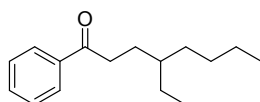

*4-ethyl-1-phenyloctan-1-one* (**5t**). Yield: 59%;  $^1\text{H}$  NMR (400 MHz,

$\text{CDCl}_3$ )  $\delta$  8.01-7.97 (m, 2H), 7.61-7.55 (m, 1H), 7.48 (t,  $J = 7.6$  Hz, 2H), 3.01-2.93 (m, 2H), 1.72 (td,  $J = 8.8, 5.7$  Hz, 2H), 1.35-1.26 (m, 6H), 0.95-0.86 (m, 7H).

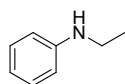

*N*-ethylaniline (**7a**) (Yield: 65%).  $^1\text{H}$  NMR (400 MHz,  $\text{CDCl}_3$ )  $\delta$  7.20 (t,  $J = 7.8$  Hz, 2H), 6.72 (t,  $J = 7.3$  Hz, 1H), 6.64 (d,  $J = 8.0$  Hz, 2H), 3.55 (s, 1H), 3.19 (q,  $J = 7.1$  Hz, 2H), 1.28 (t,  $J = 7.1$  Hz, 3H);  $^{13}\text{C}$  NMR (101 MHz,  $\text{CDCl}_3$ )  $\delta$  148.4, 129.2, 117.2, 112.7, 38.4, 14.9.

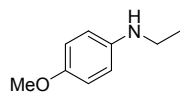

*N*-ethyl-4-methoxyaniline (**7b**) (Yield: 72%).  $^1\text{H}$  NMR (400 MHz,  $\text{CDCl}_3$ )  $\delta$  6.69 (d,  $J = 8.8$  Hz, 2H), 6.48 (d,  $J = 8.8$  Hz, 2H), 3.64 (s, 3H), 3.18-2.94 (m, 3H), 1.13 (t,  $J = 7.1$  Hz, 3H);  $^{13}\text{C}$  NMR (101 MHz,  $\text{CDCl}_3$ )  $\delta$  152.1, 142.8, 114.9, 114.1, 55.8, 39.4, 15.0.

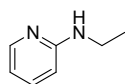

*N*-ethylpyridin-2-amine (**7c**) (Yield: 58%).  $^1\text{H}$  NMR (400 MHz,  $\text{CDCl}_3$ )  $\delta$  8.05 (s, 1H), 7.47-7.32 (m, 1H), 6.63-6.45 (m, 1H), 6.42-6.26 (m, 1H), 3.84-2.57 (m, 3H), 1.26-1.19 (m, 3H);  $^{13}\text{C}$  NMR (101 MHz,  $\text{CDCl}_3$ )  $\delta$  158.8, 148.0, 137.4, 112.5, 106.3, 36.8, 14.7.

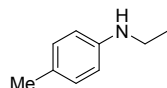

*N*-ethyl-4-methylaniline (**7d**) (Yield: 78%).  $^1\text{H}$  NMR (400 MHz,  $\text{CDCl}_3$ )  $\delta$  7.02 (d,  $J = 8.1$  Hz, 2H), 6.57 (d,  $J = 8.3$  Hz, 2H), 3.16 (q,  $J = 7.1$  Hz, 2H), 2.27 (s, 3H), 1.41-1.15 (m, 4H);  $^{13}\text{C}$  NMR (101 MHz,  $\text{CDCl}_3$ )  $\delta$  146.2, 129.7, 126.4, 113.0, 38.8, 20.3, 14.9.

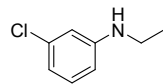

3-chloro-*N*-ethylaniline (**7e**) (Yield: 63%).  $^1\text{H}$  NMR (400 MHz,  $\text{CDCl}_3$ )  $\delta$  7.08 (t,  $J = 8.0$  Hz, 1H), 6.67 (dd,  $J = 7.9, 0.9$  Hz, 1H), 6.59 (s, 1H), 6.48 (dd,  $J = 8.2, 2.0$  Hz, 1H), 3.65 (s, 1H), 3.16 (q,  $J = 7.1$  Hz, 2H), 1.28 (t,  $J = 7.1$  Hz, 3H);  $^{13}\text{C}$  NMR (101 MHz,  $\text{CDCl}_3$ )  $\delta$  149.5, 135.0, 130.1, 116.9, 112.2, 111.0, 38.3, 14.7.

Selected NMR spectra of the obtained compounds

<sup>1</sup>H NMR of **5a**

20130912  
KY-1-37B

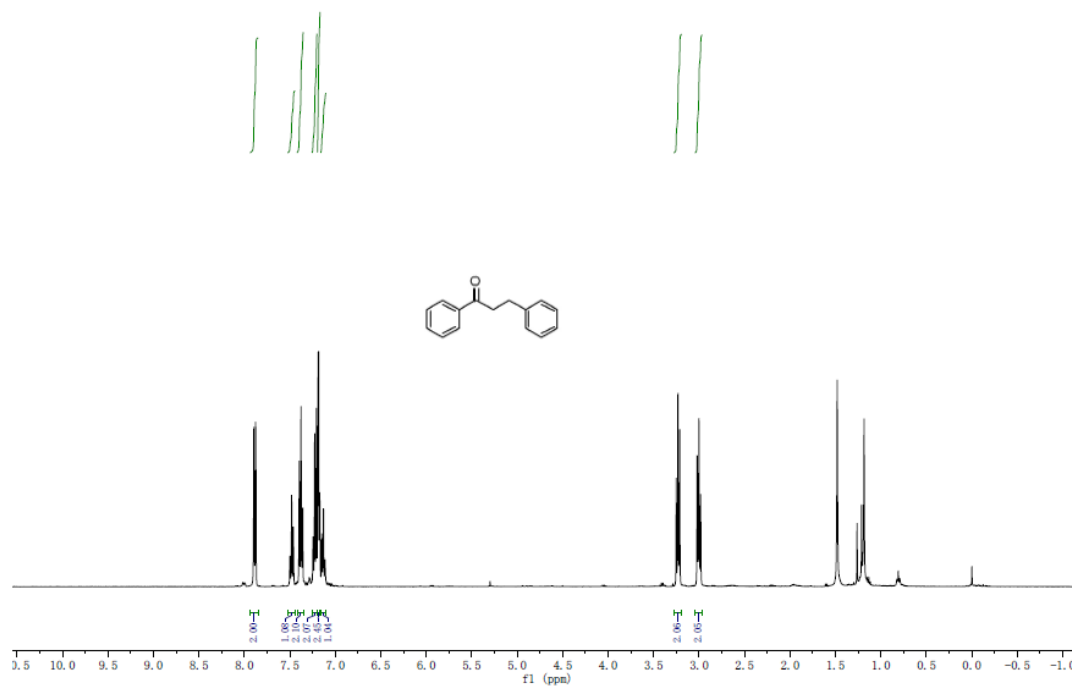

<sup>13</sup>C NMR of **5a**

20130916  
KY-1-37B

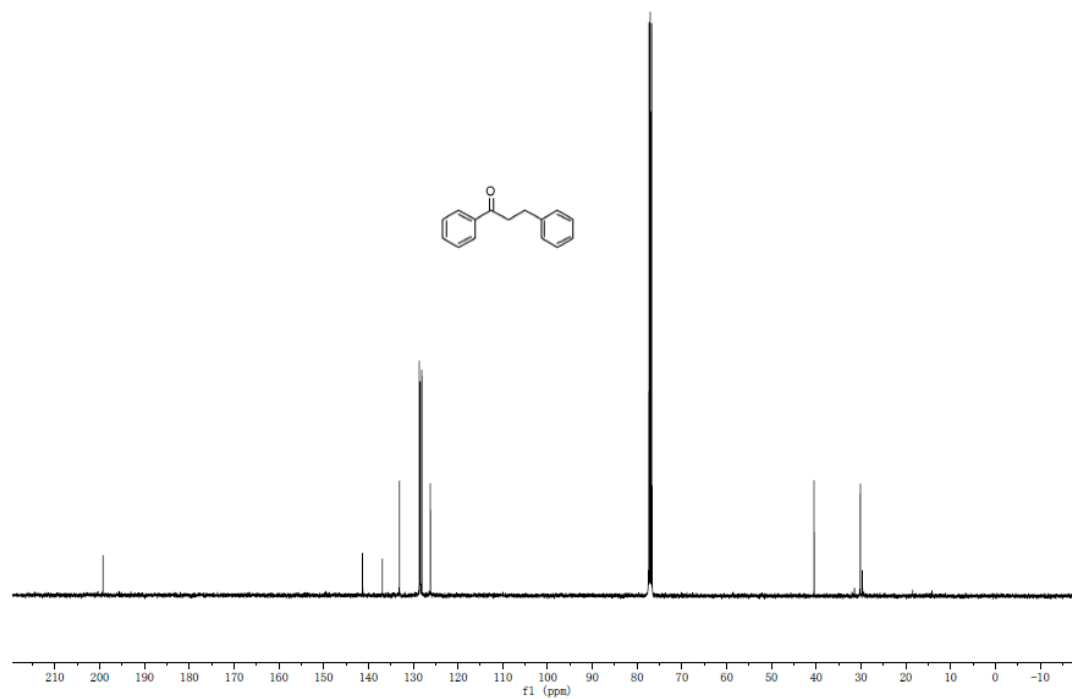

<sup>1</sup>H NMR of **5b**

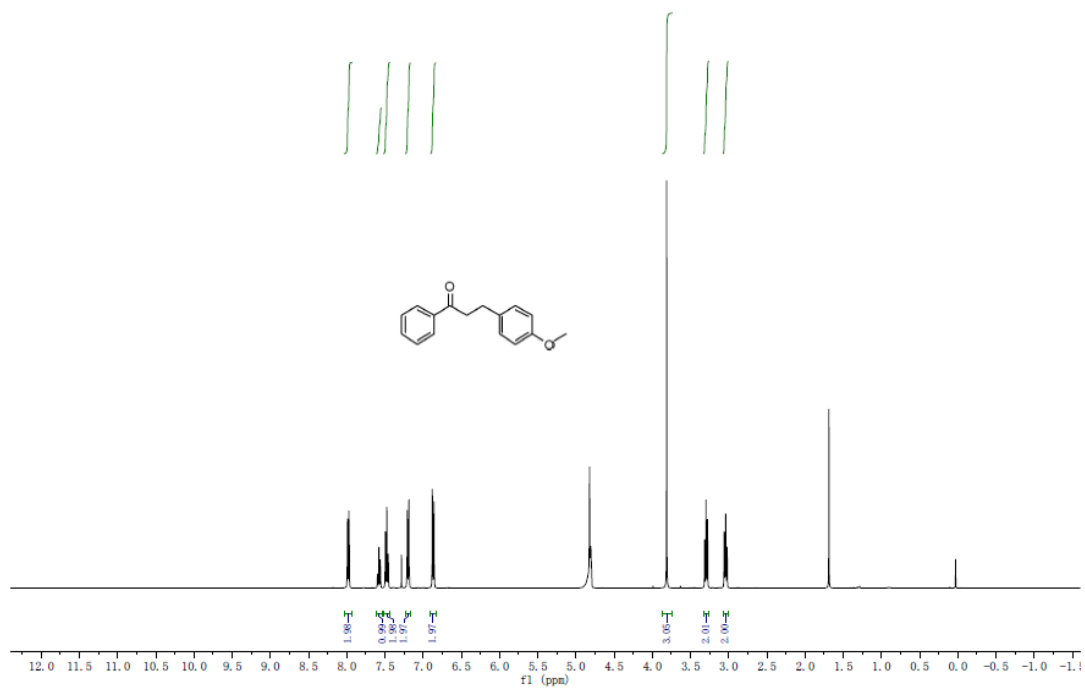

<sup>1</sup>H NMR of **5c**

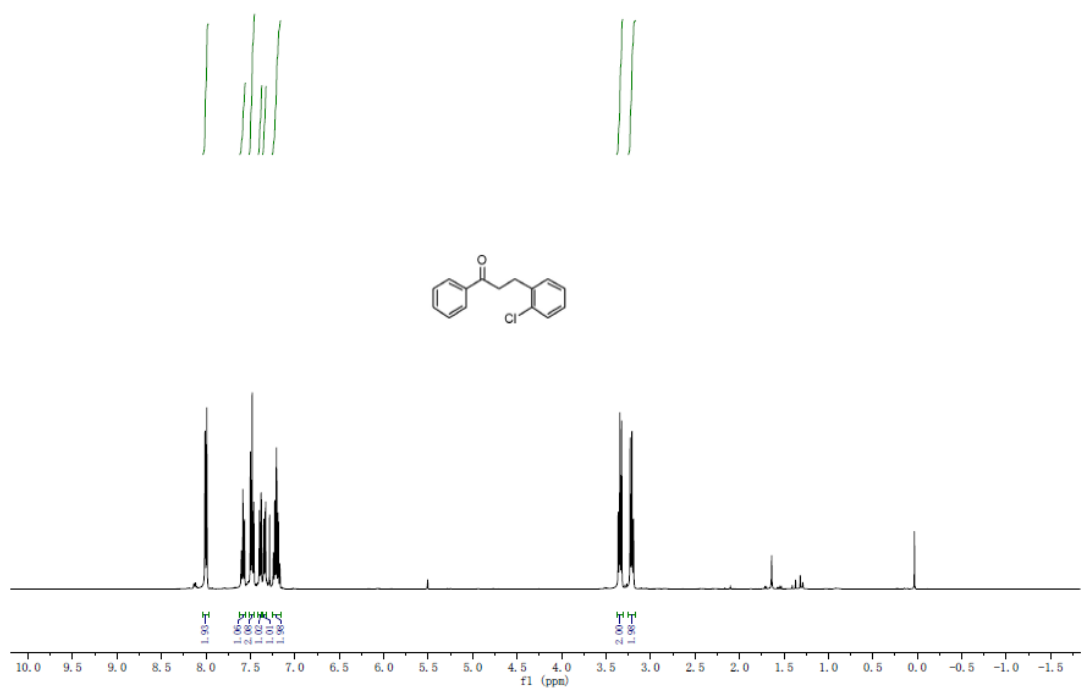



### $^1\text{H}$ NMR of **5d**

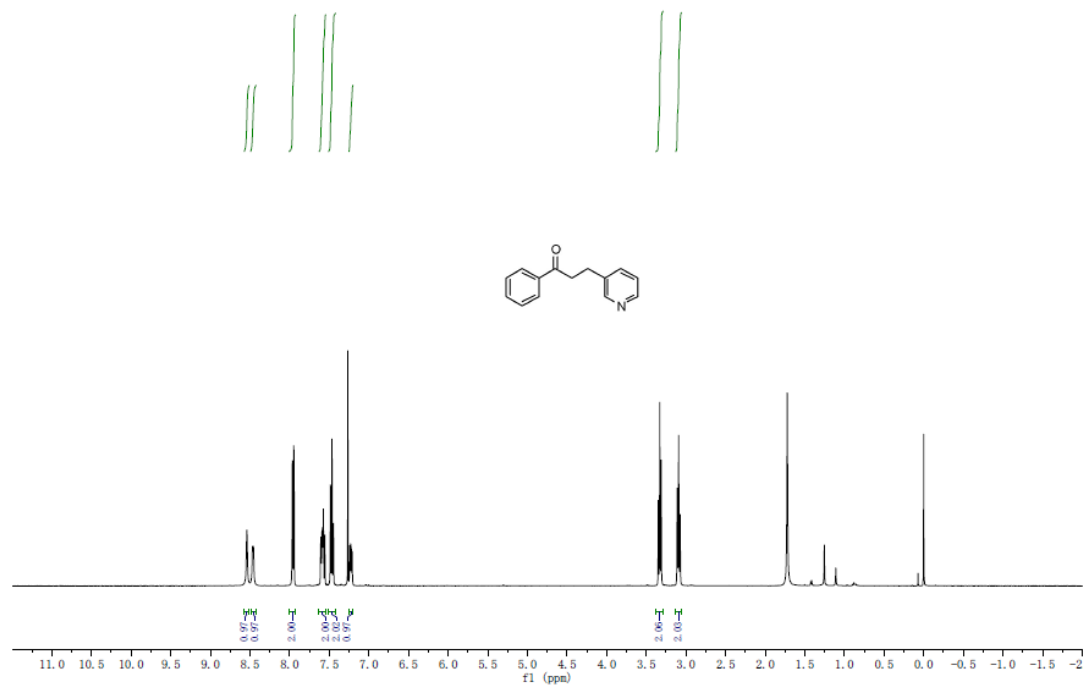

### $^{13}\text{C}$ NMR of **5d**

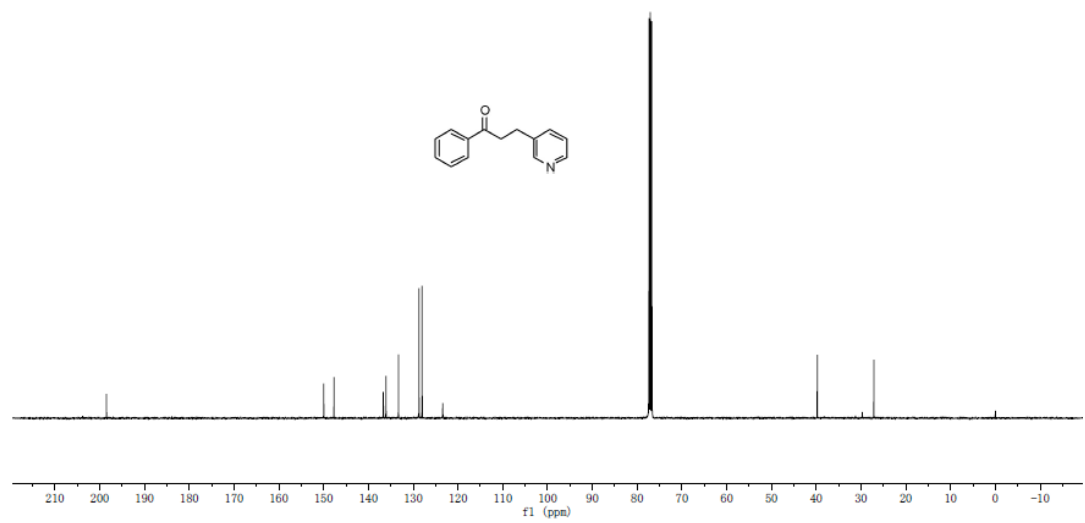

<sup>1</sup>H NMR of **5e**

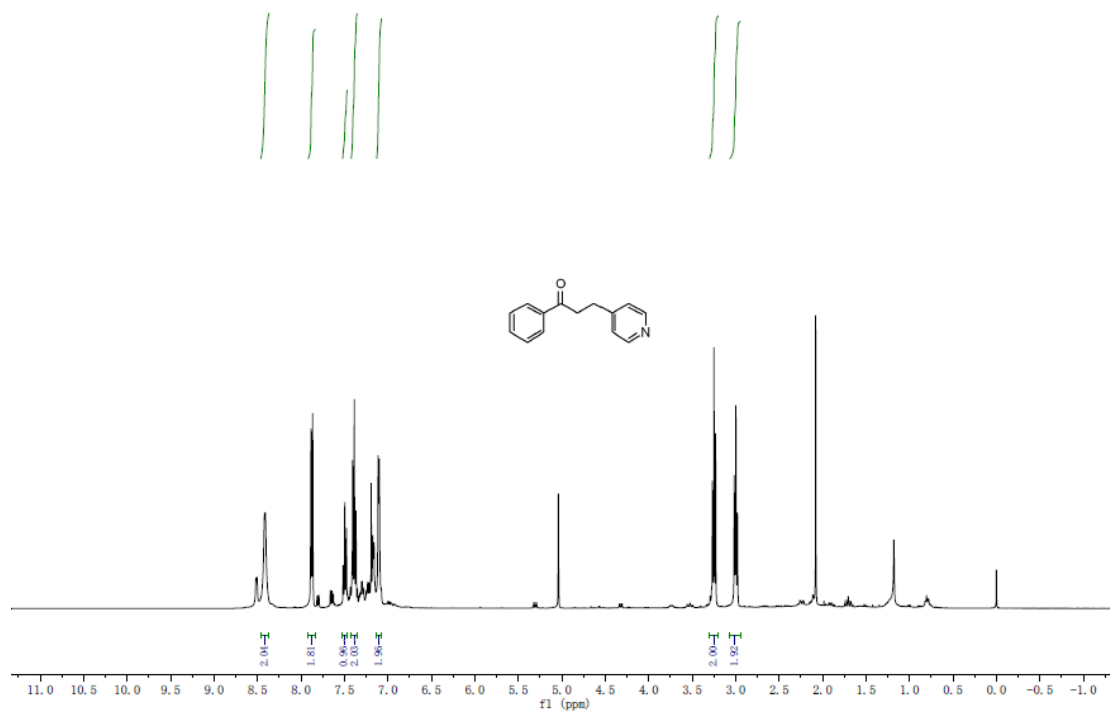

<sup>13</sup>C NMR of **5e**

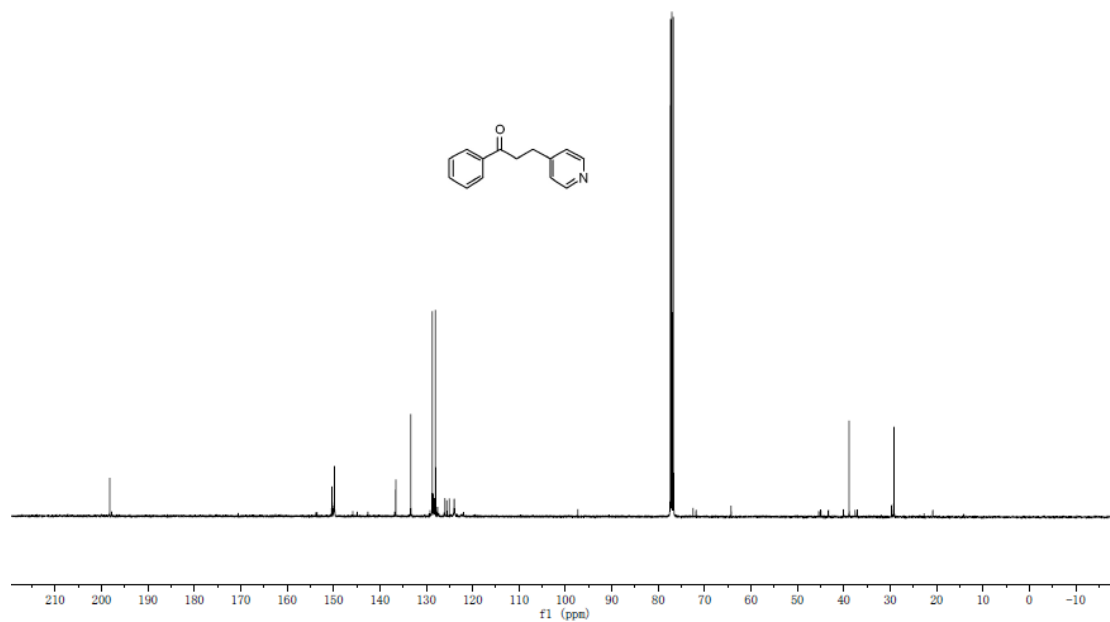

<sup>1</sup>H NMR of **5f**

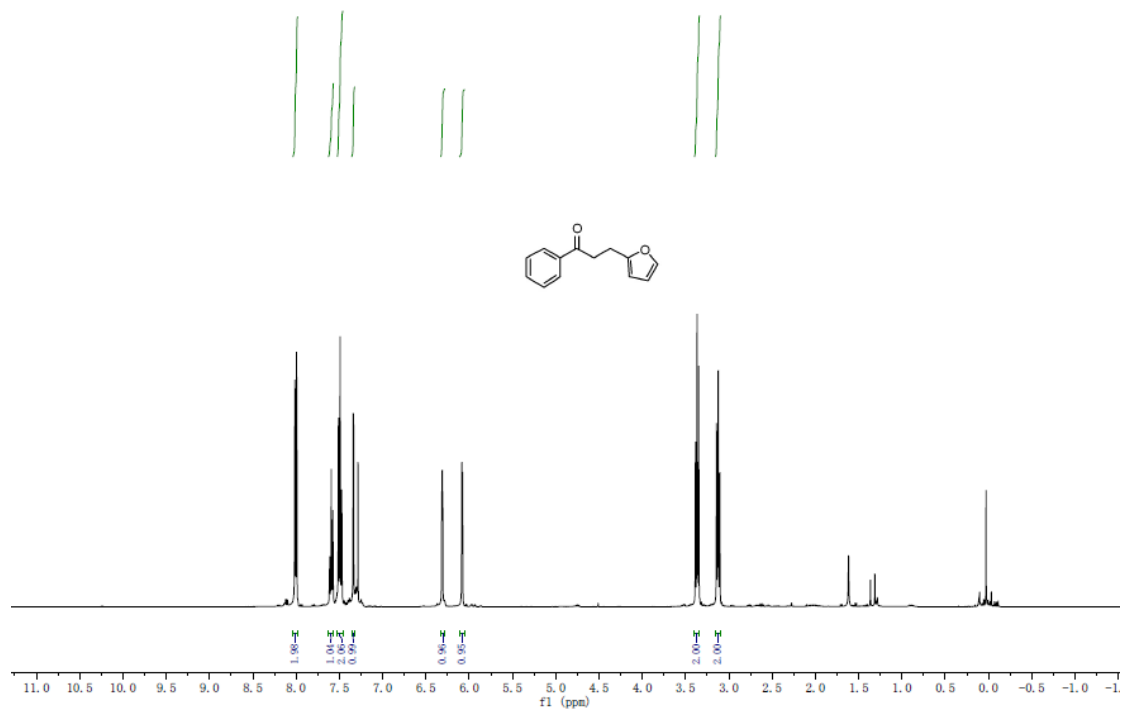

<sup>1</sup>H NMR of **5g**

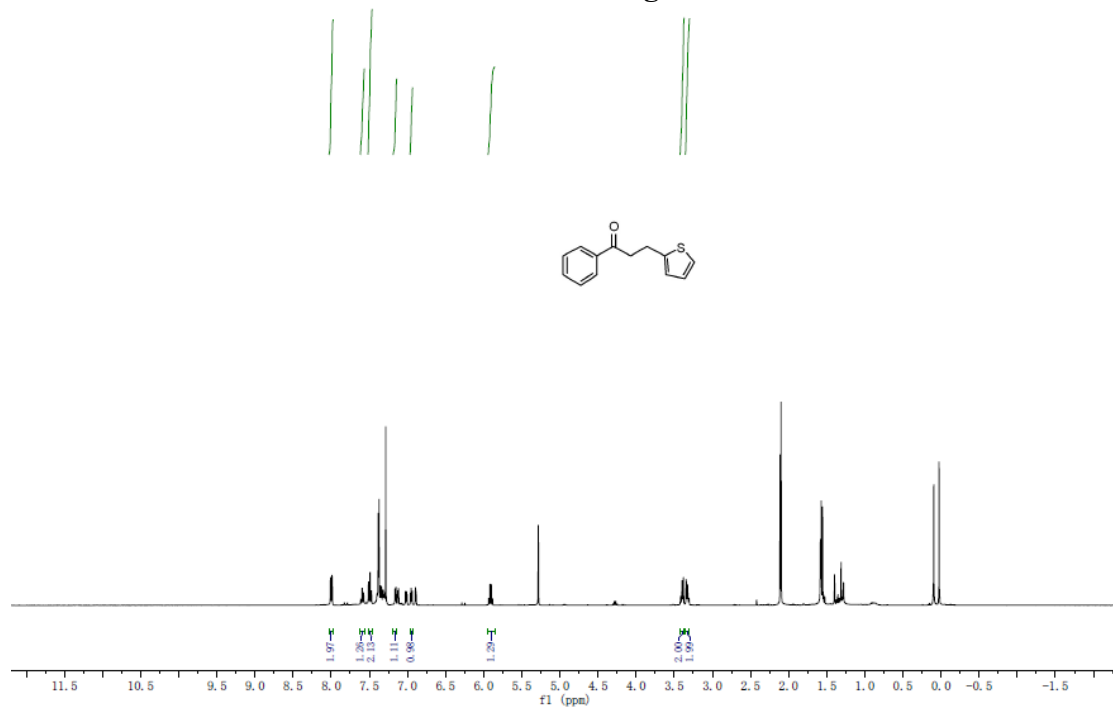

### <sup>1</sup>H NMR of **5h**

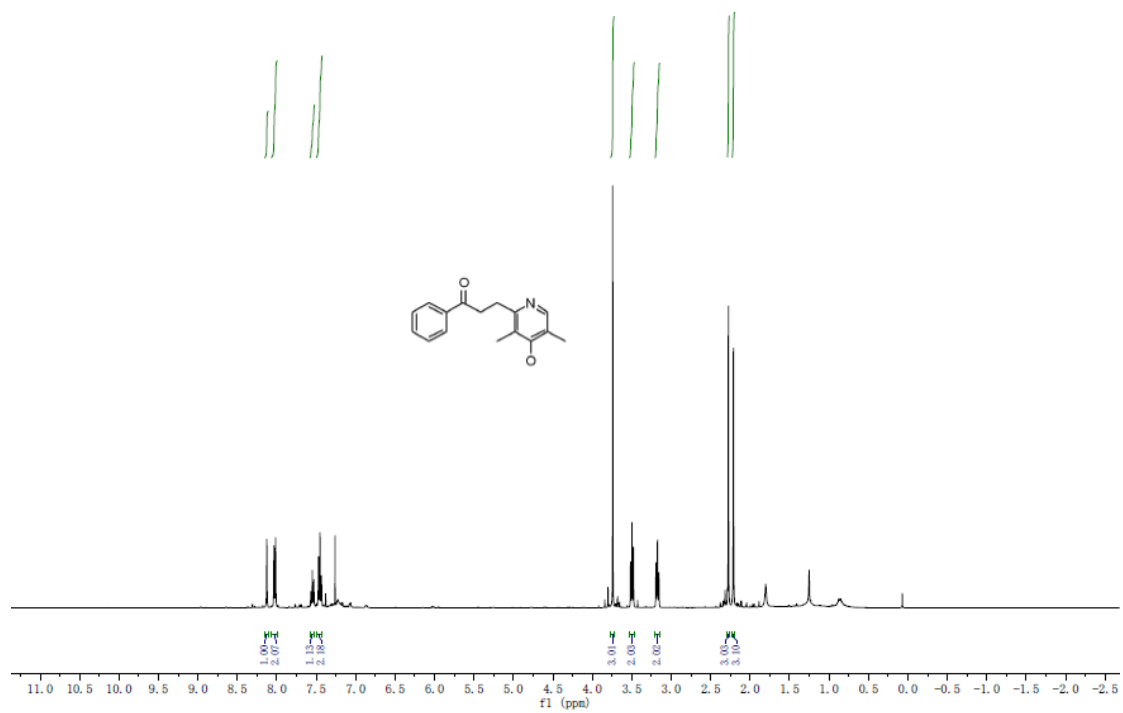

### <sup>13</sup>C NMR of **5h**

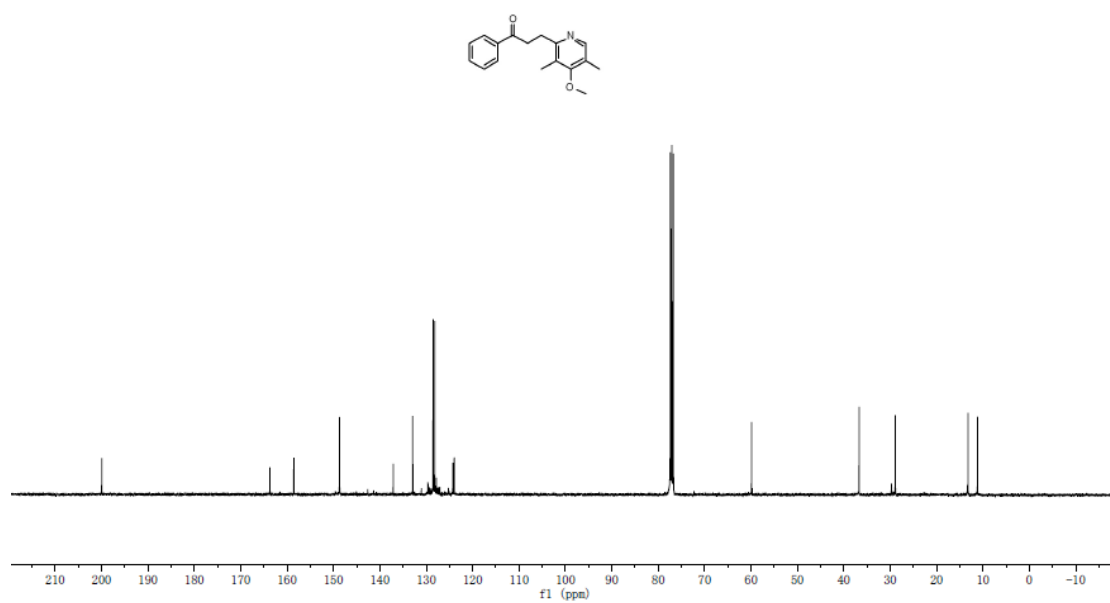

<sup>1</sup>H NMR of **5i**

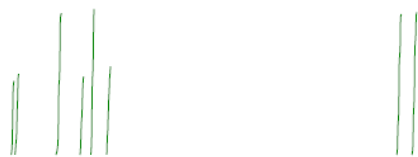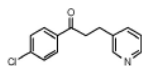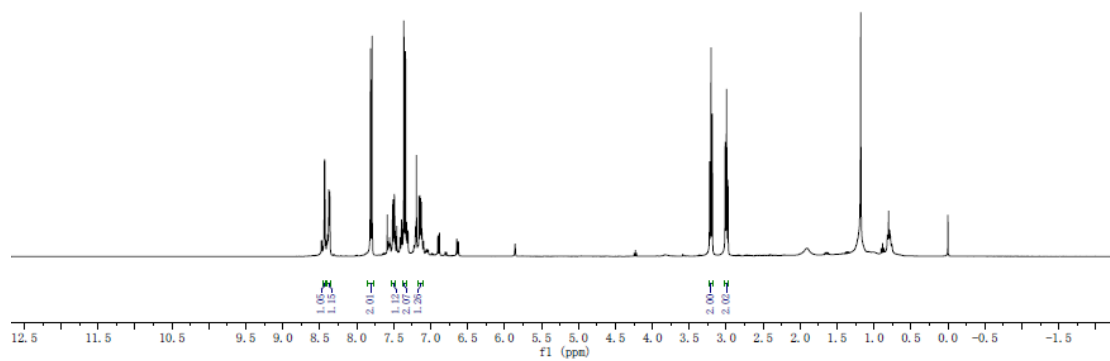

<sup>13</sup>C NMR of **5i**

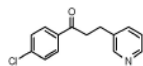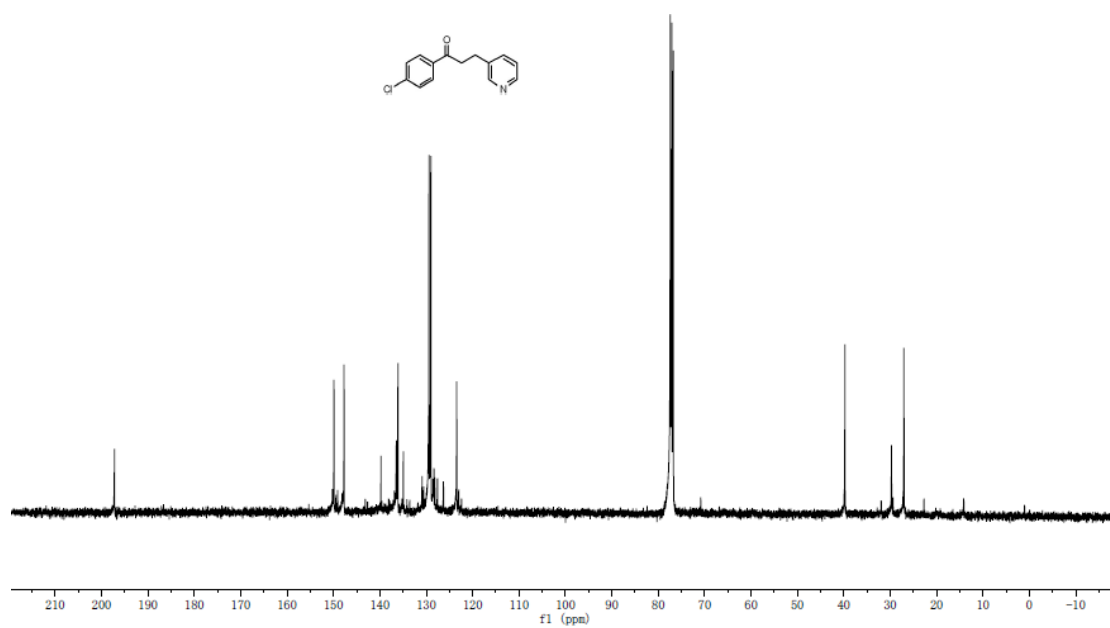

<sup>1</sup>H NMR of **5j**

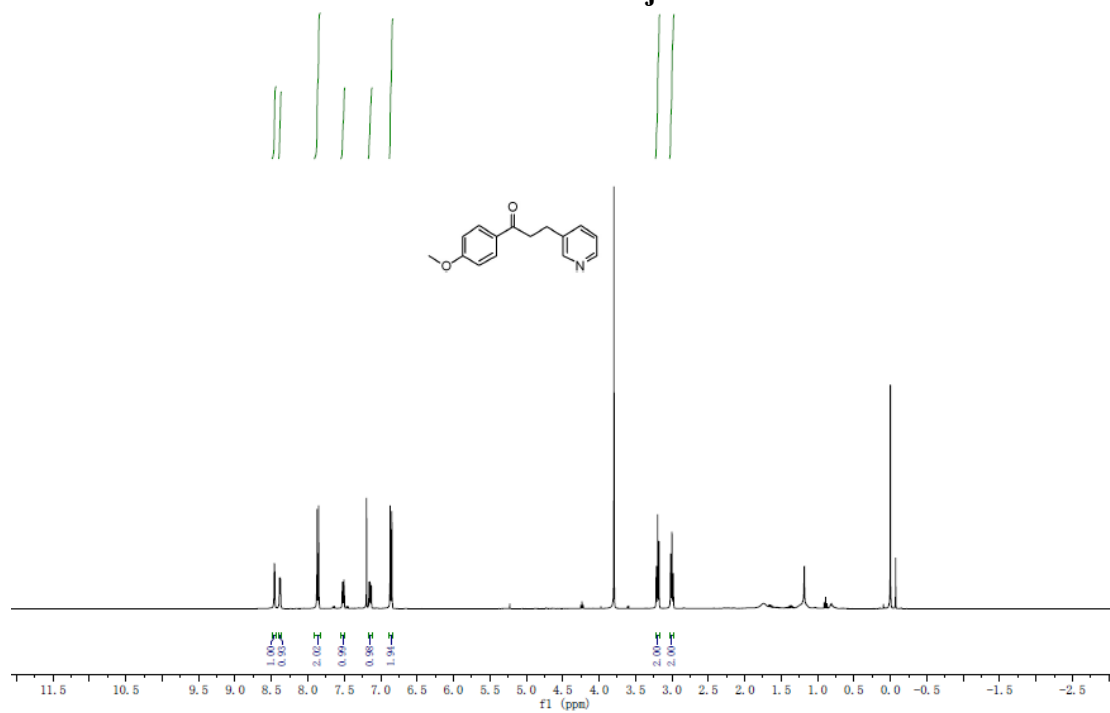

<sup>13</sup>C NMR of **5j**

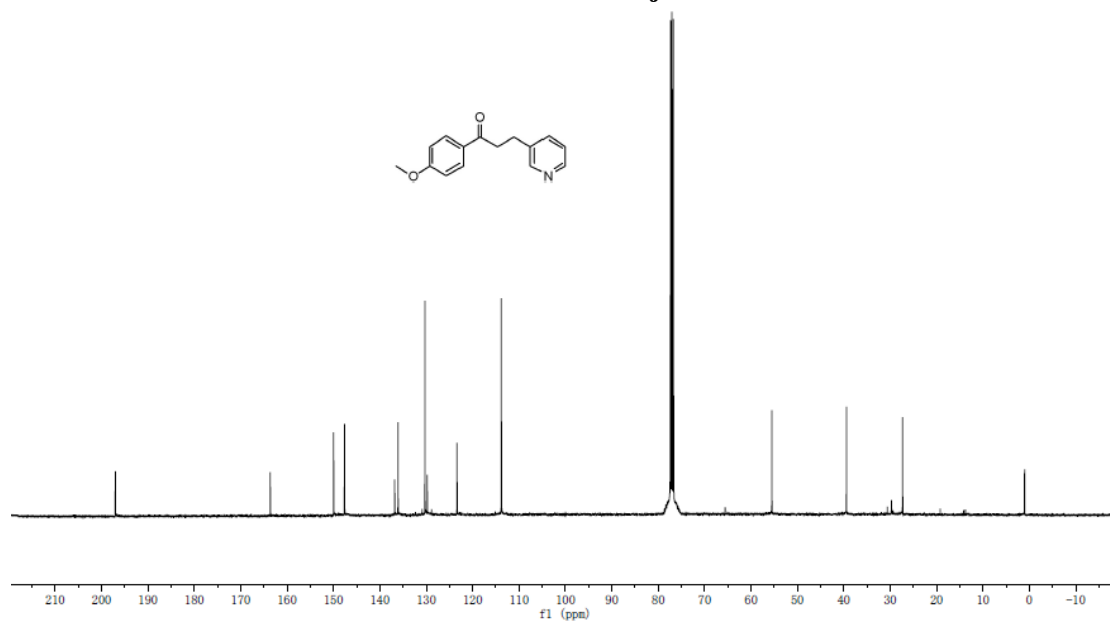

<sup>1</sup>H NMR of **5k**

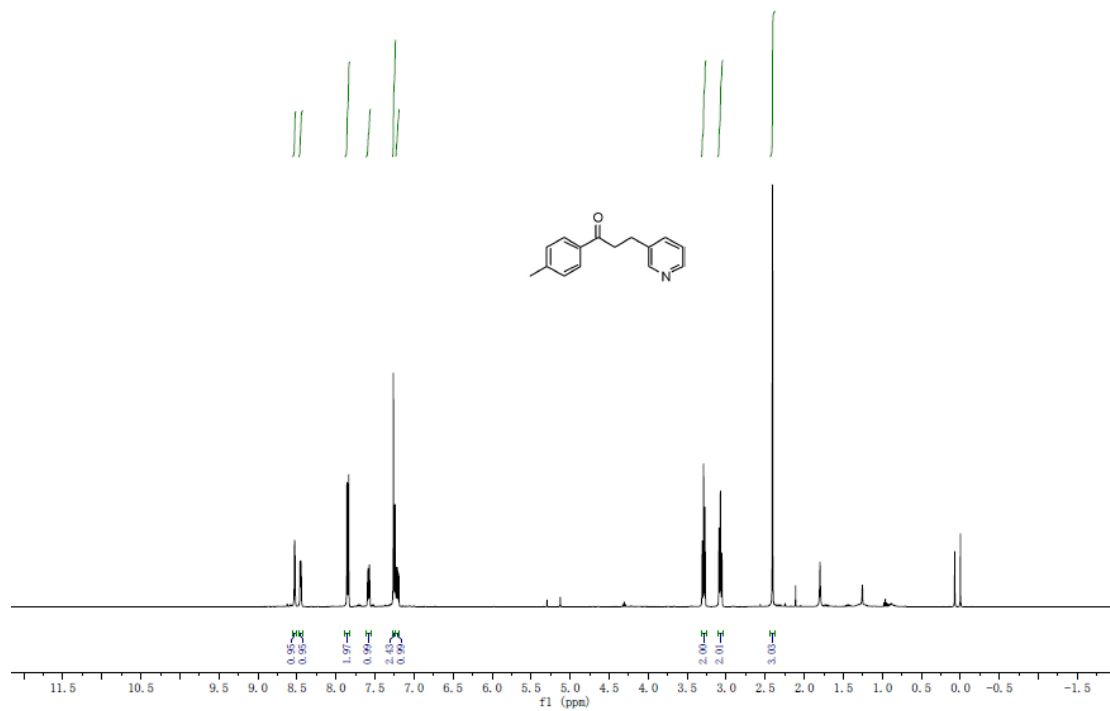

<sup>13</sup>C NMR of **5k**

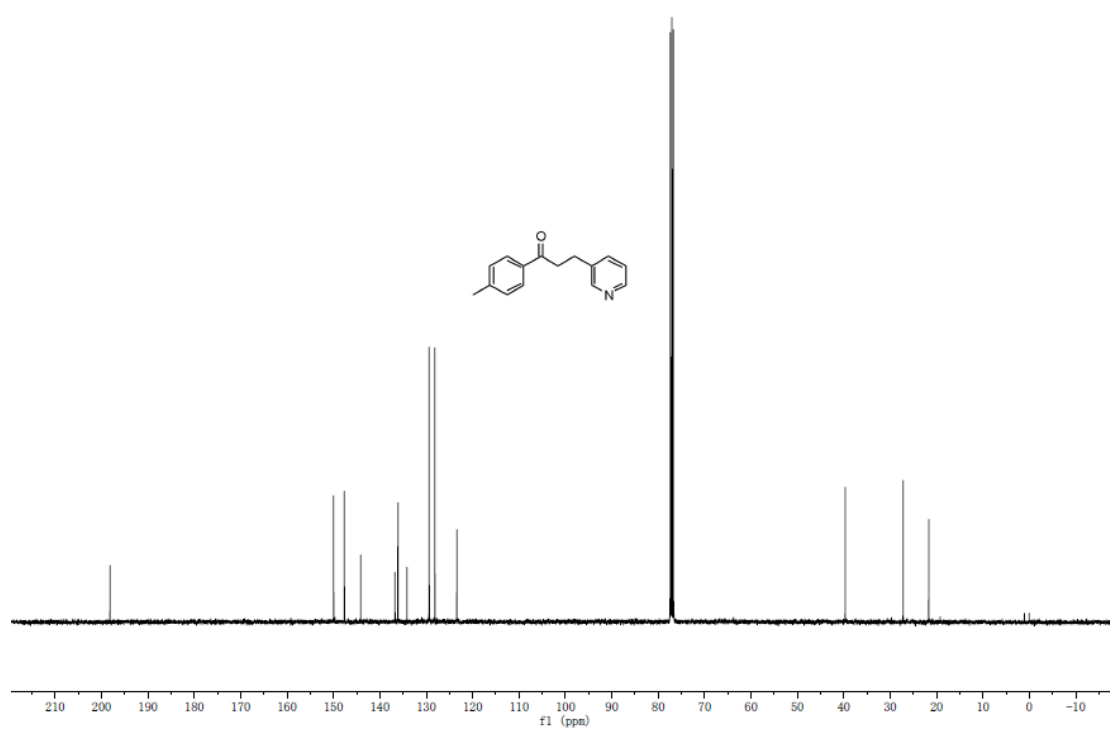

<sup>1</sup>H NMR of **51**

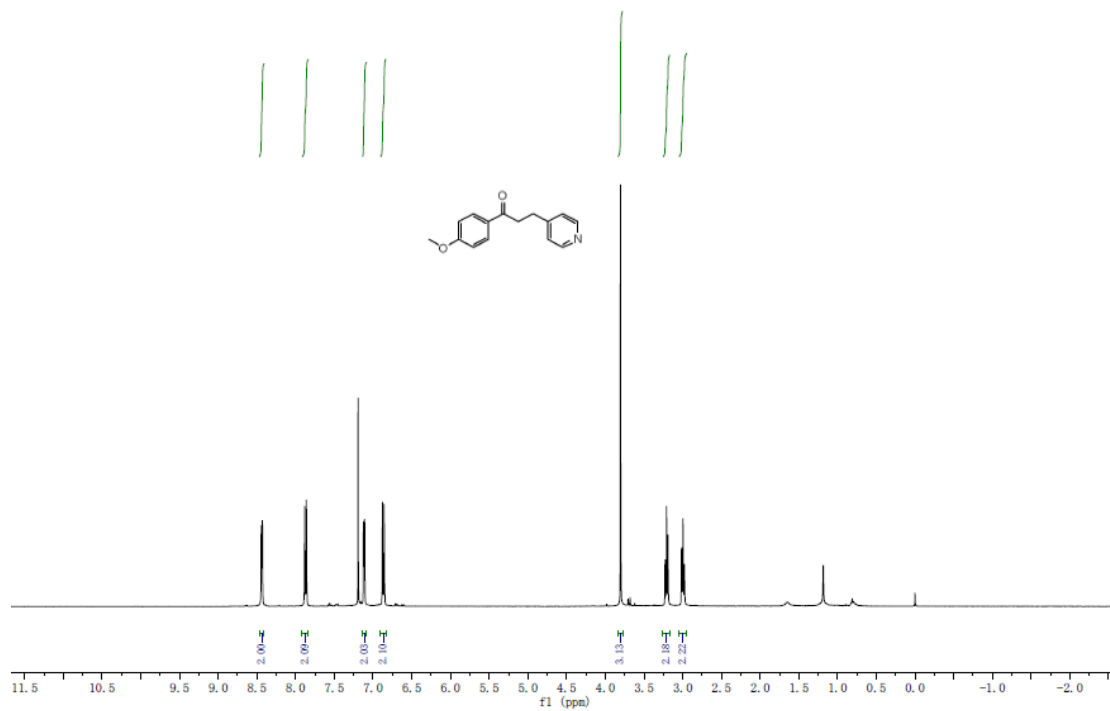

<sup>13</sup>C NMR of **51**

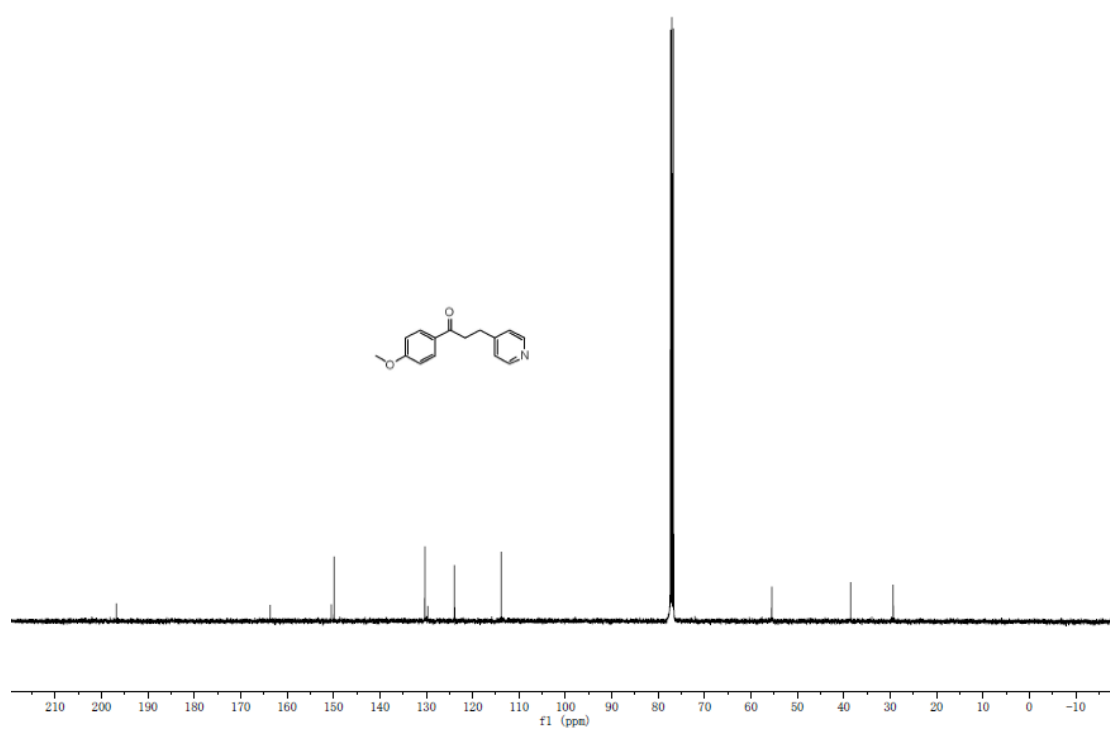



<sup>1</sup>H NMR of **5m**

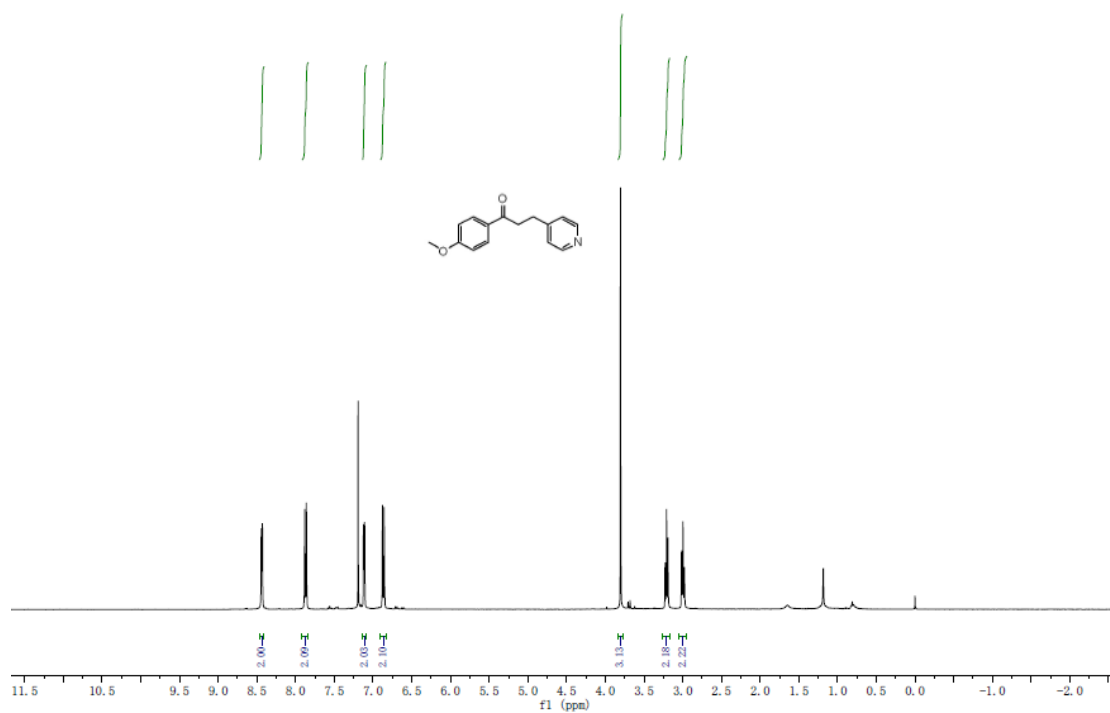

<sup>13</sup>C NMR of **5m**

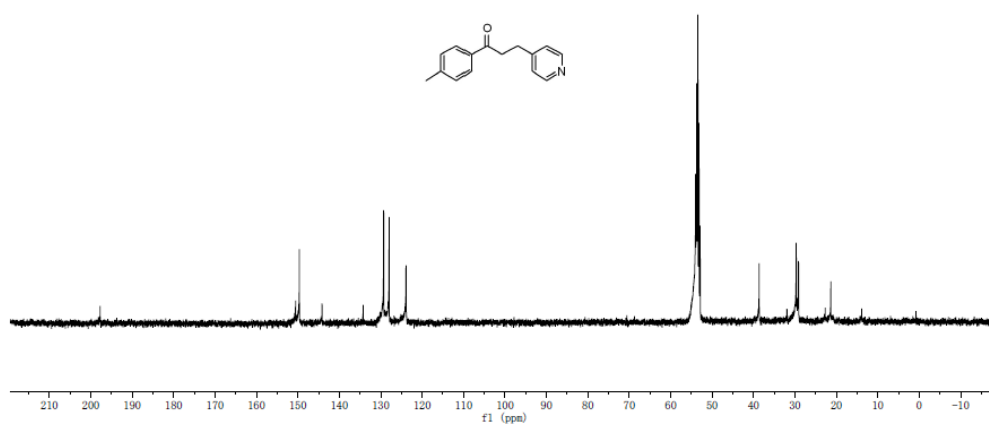

<sup>1</sup>H NMR of **5n**

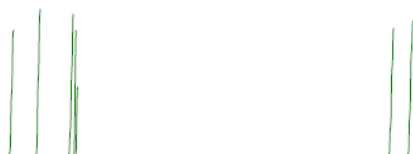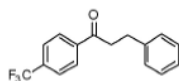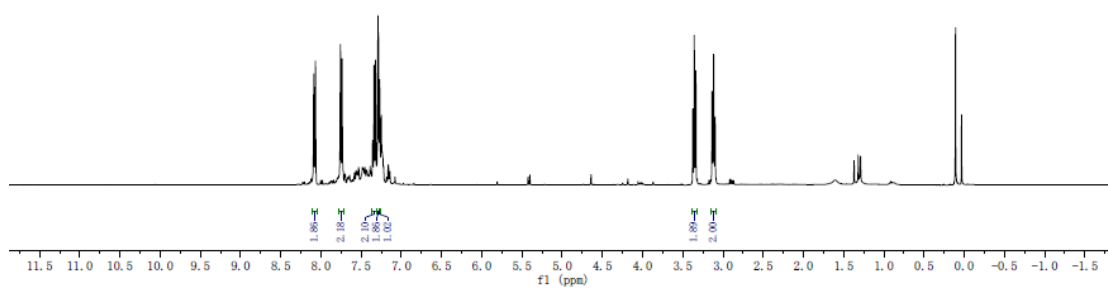

<sup>1</sup>H NMR of **5o**

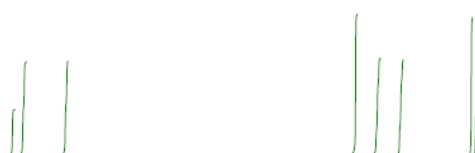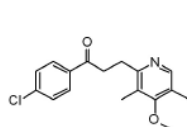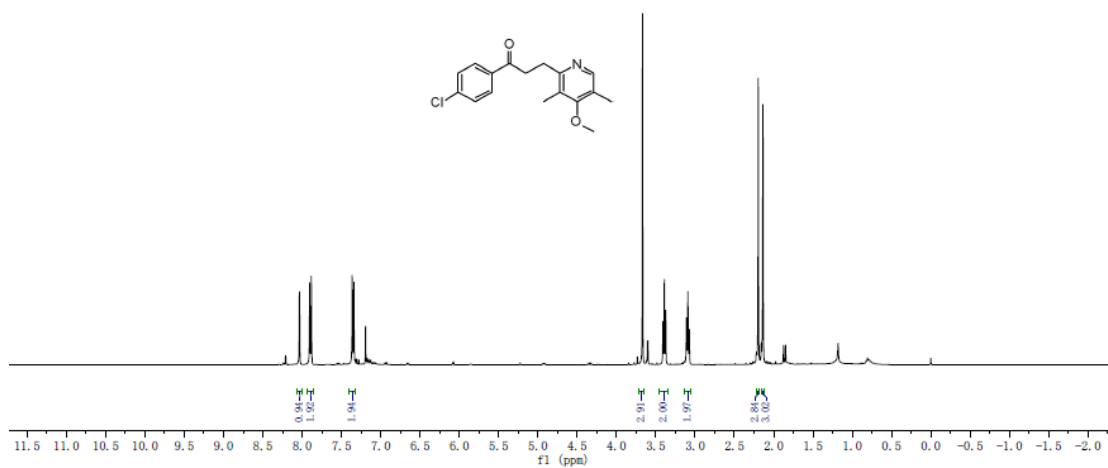

<sup>13</sup>C NMR of **5o**

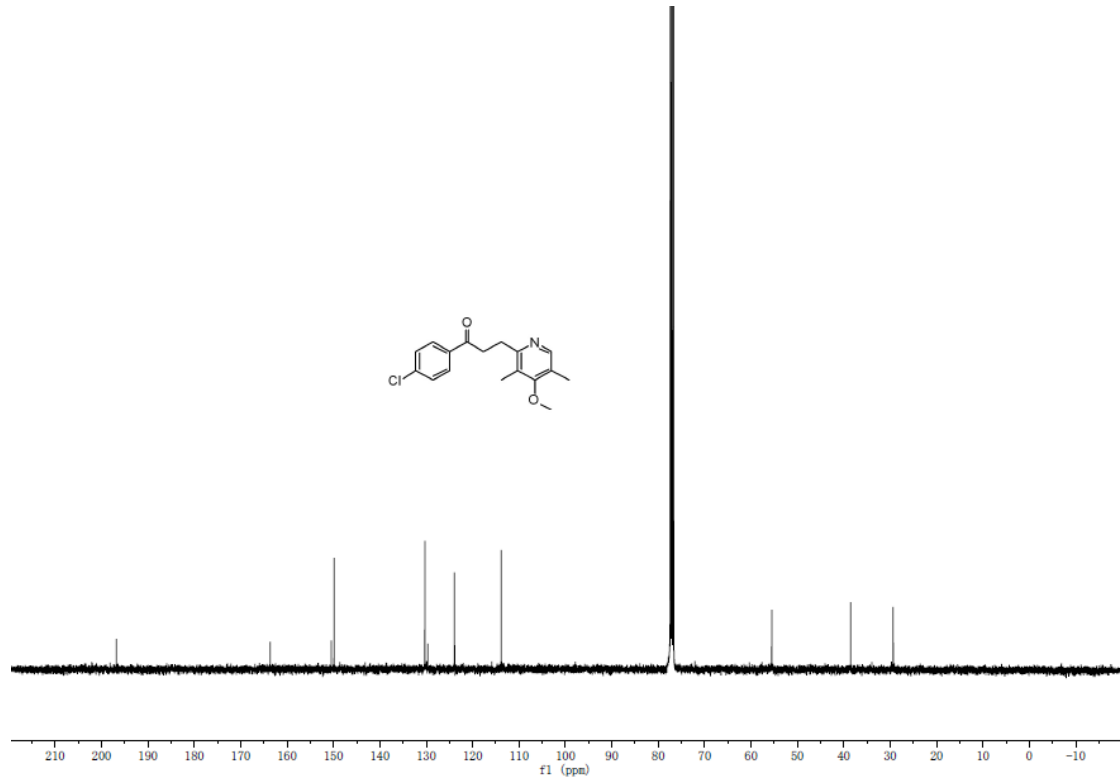

<sup>1</sup>H NMR of **5p**

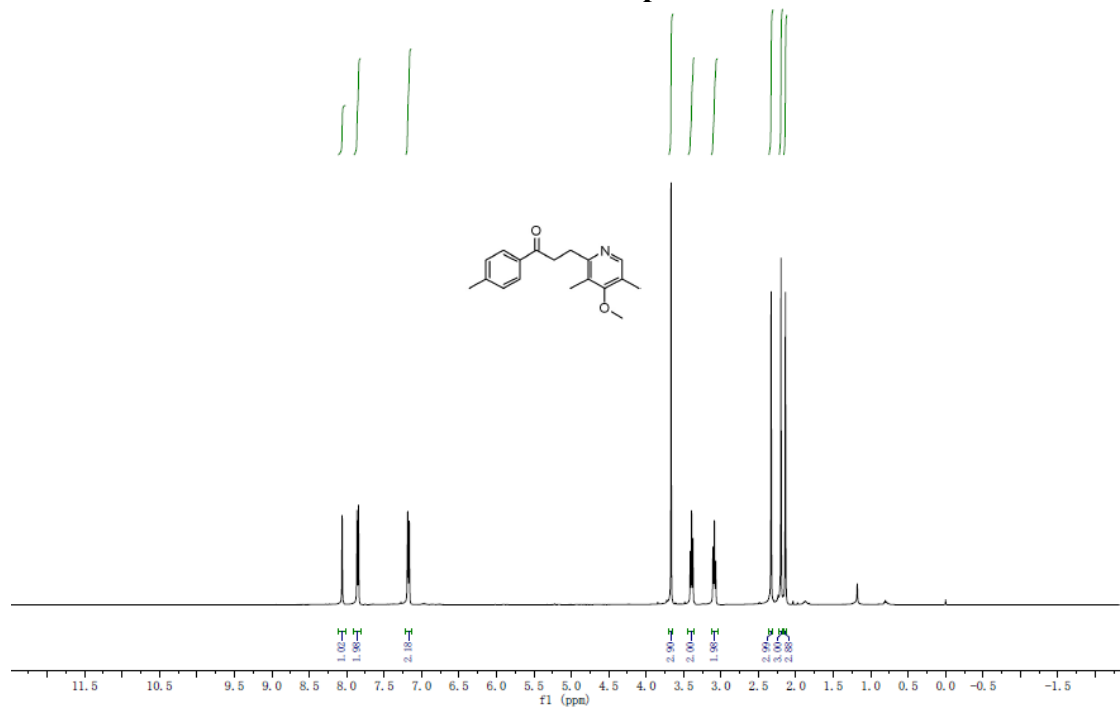

<sup>13</sup>C NMR of **5p**

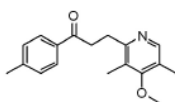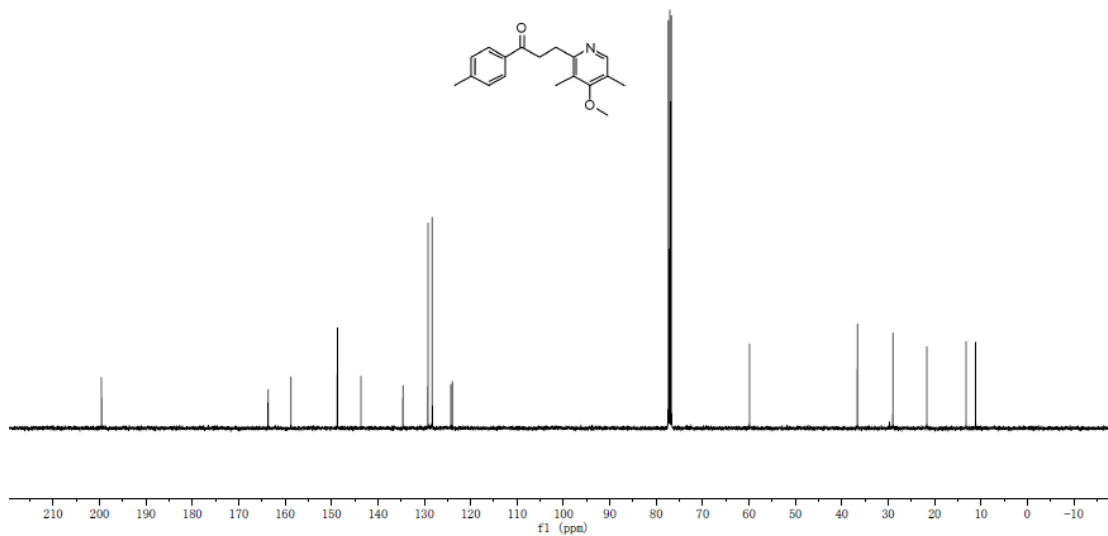

<sup>1</sup>H NMR of **5q**

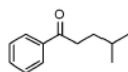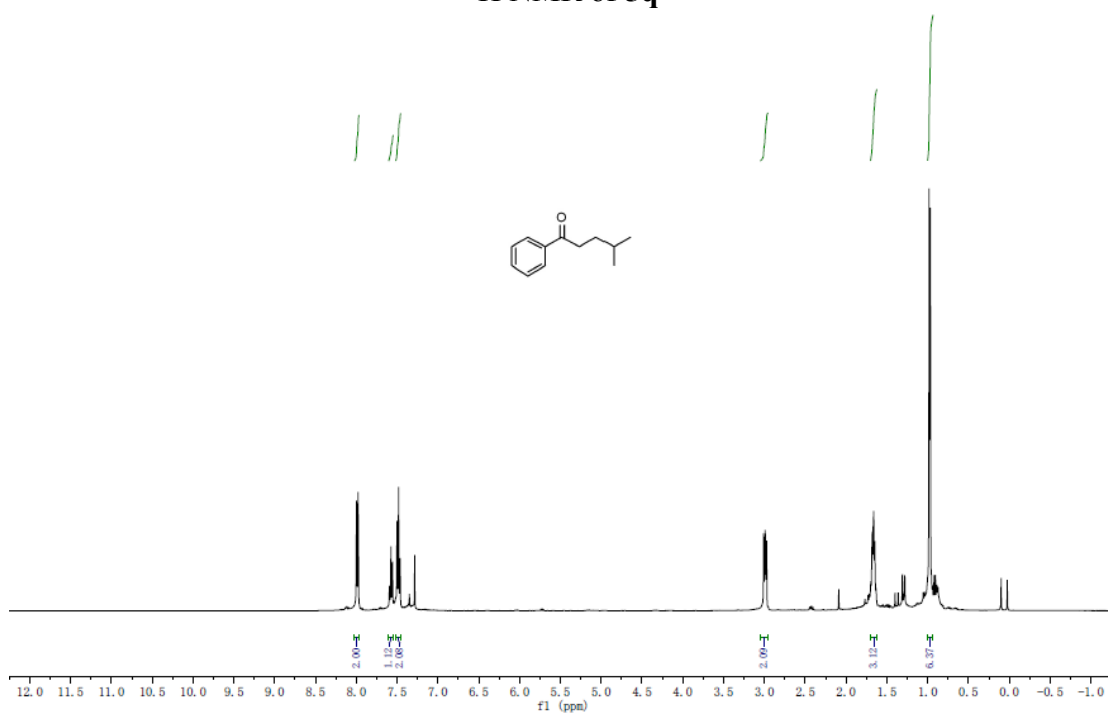

<sup>1</sup>H NMR of 5r

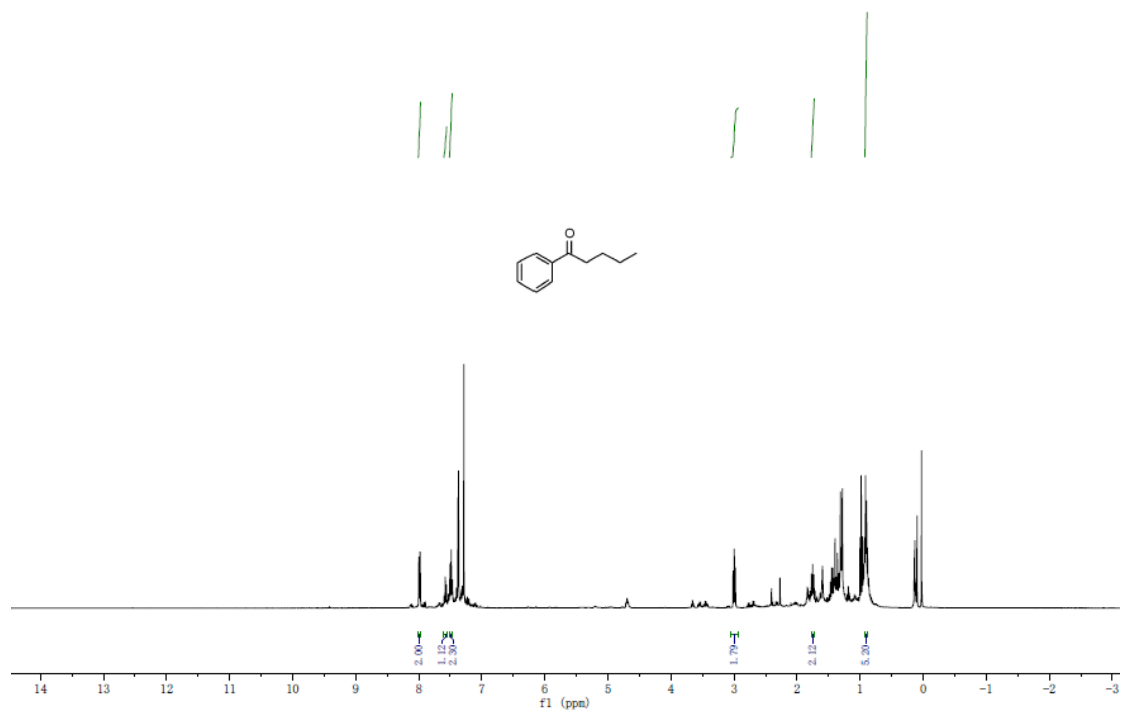

<sup>1</sup>H NMR of 5s

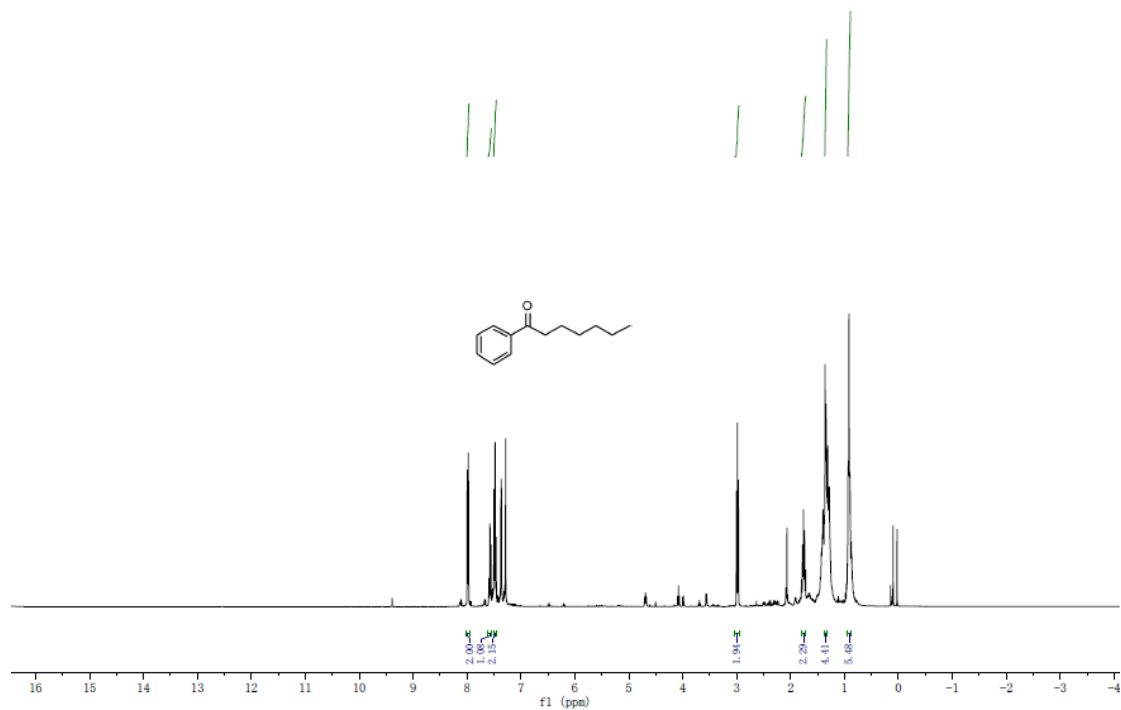

<sup>1</sup>H NMR of 5t

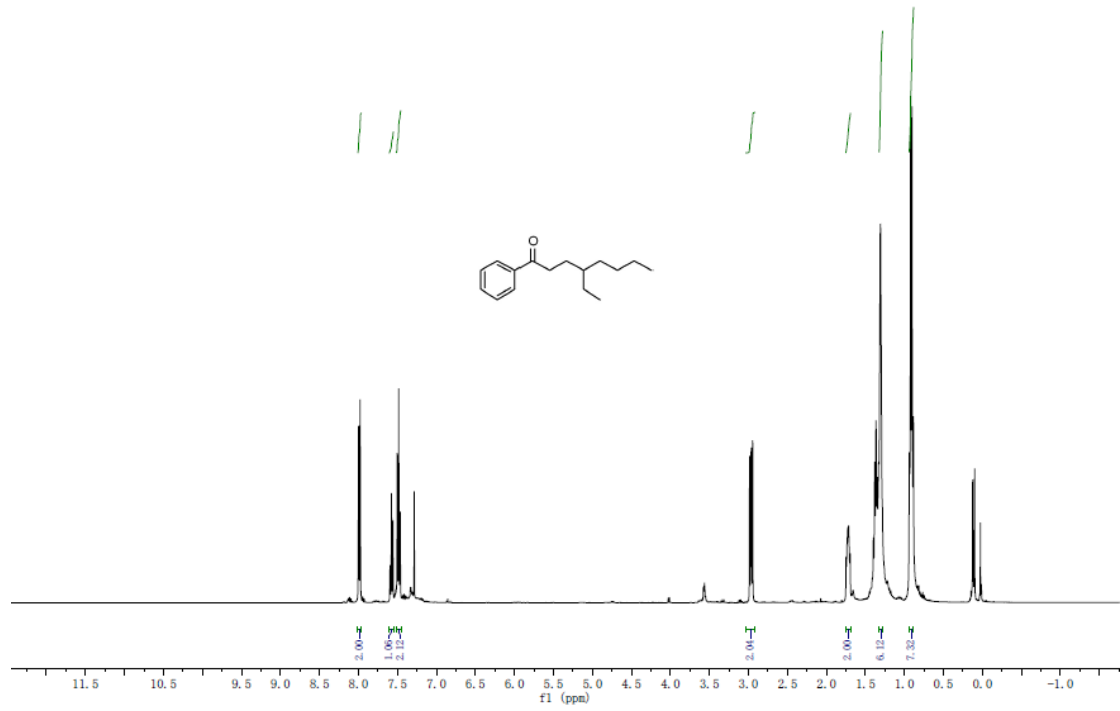

<sup>1</sup>H NMR-spectra of 7a

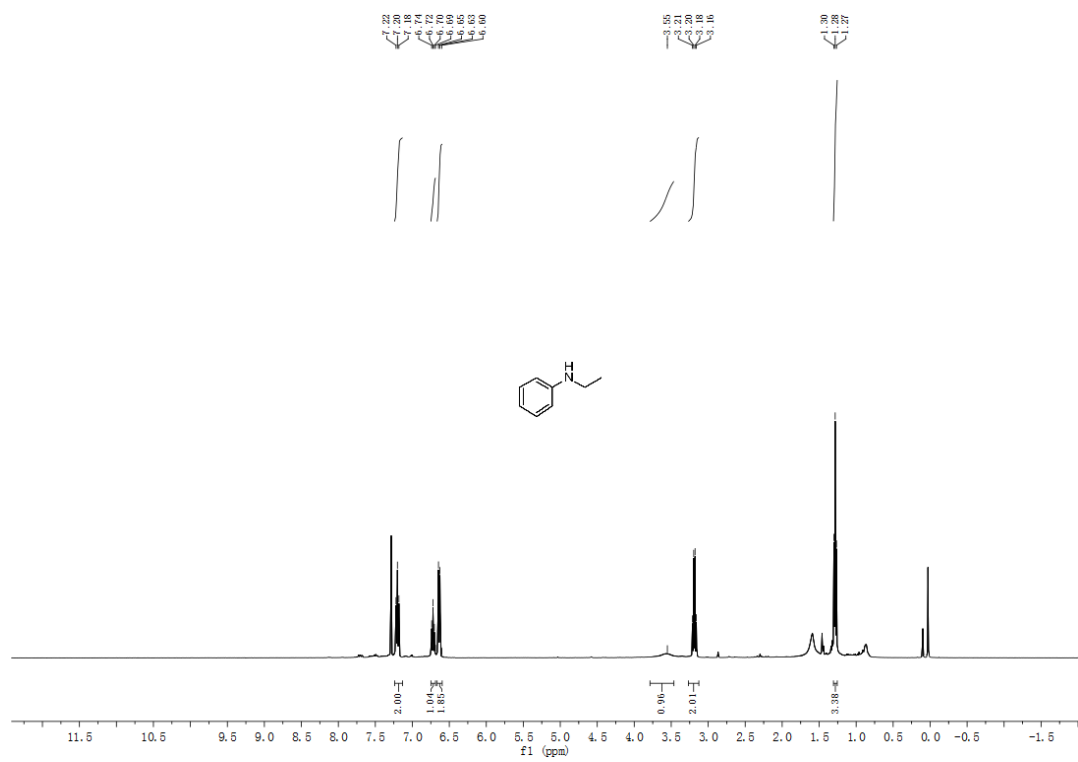

### <sup>13</sup>C NMR-spectra of **7a**

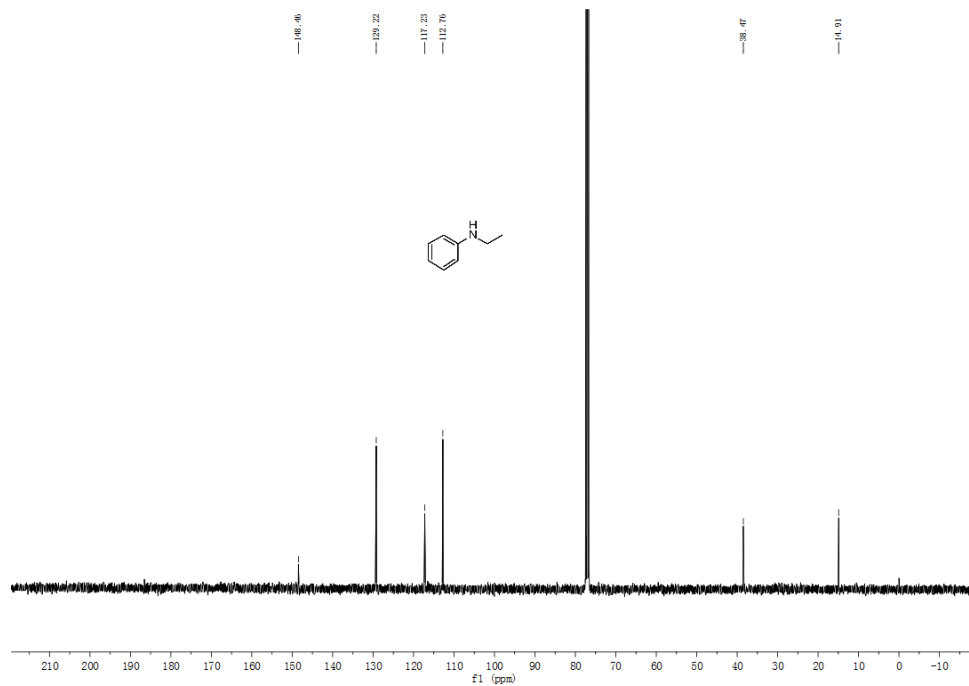

### <sup>1</sup>H NMR-spectra of **7b**

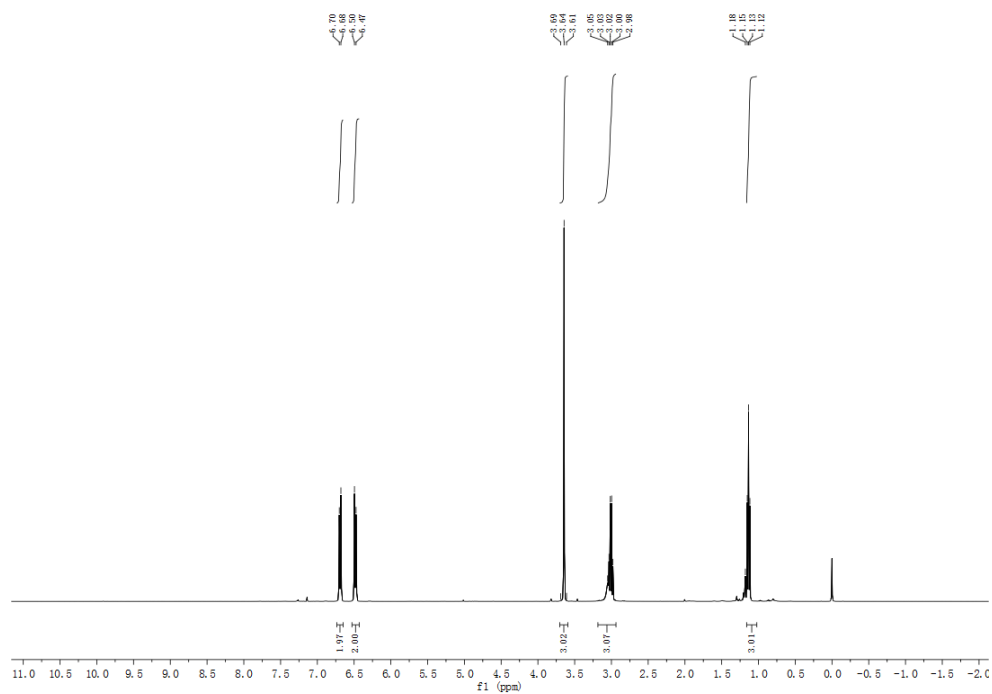

### <sup>13</sup>C NMR-spectra of 7b

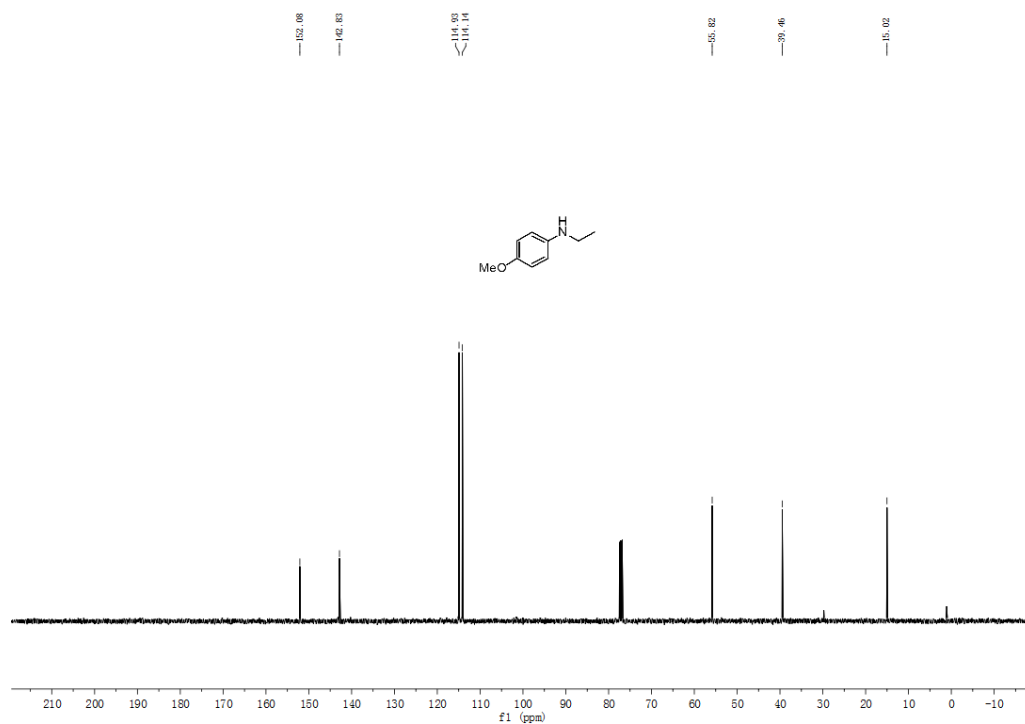

### <sup>1</sup>H NMR-spectra of 7c

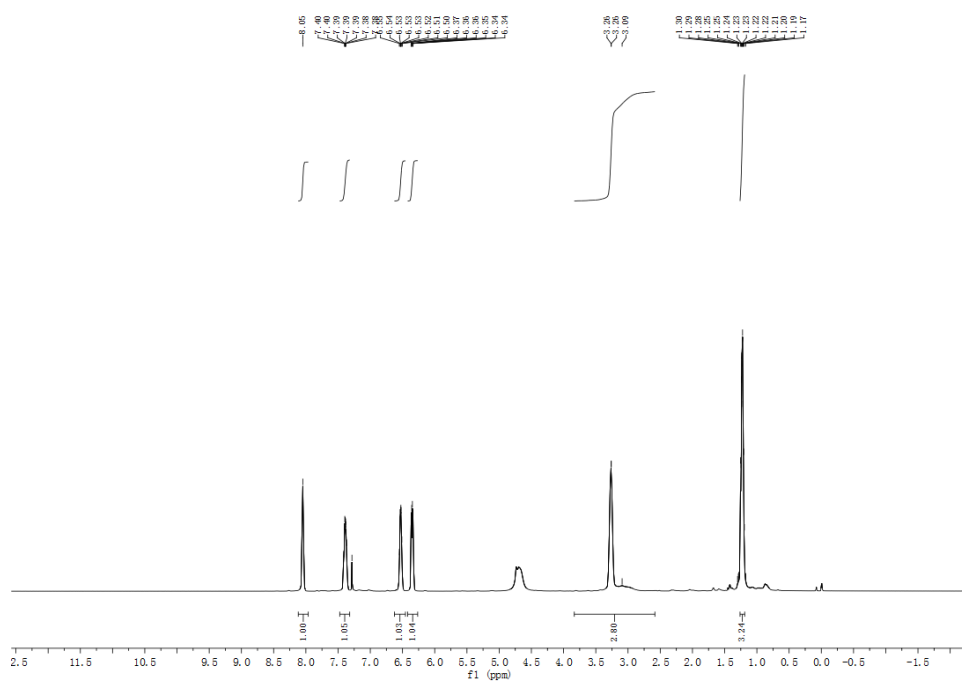



### $^{13}\text{C}$ NMR-spectra of **7c**

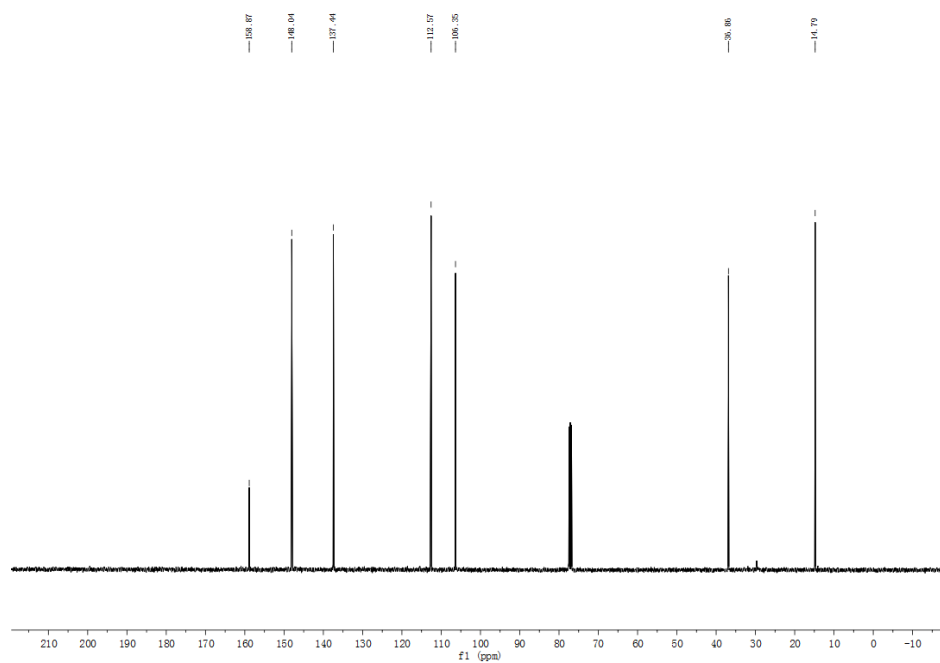

### $^1\text{H}$ NMR-spectra of **7d**

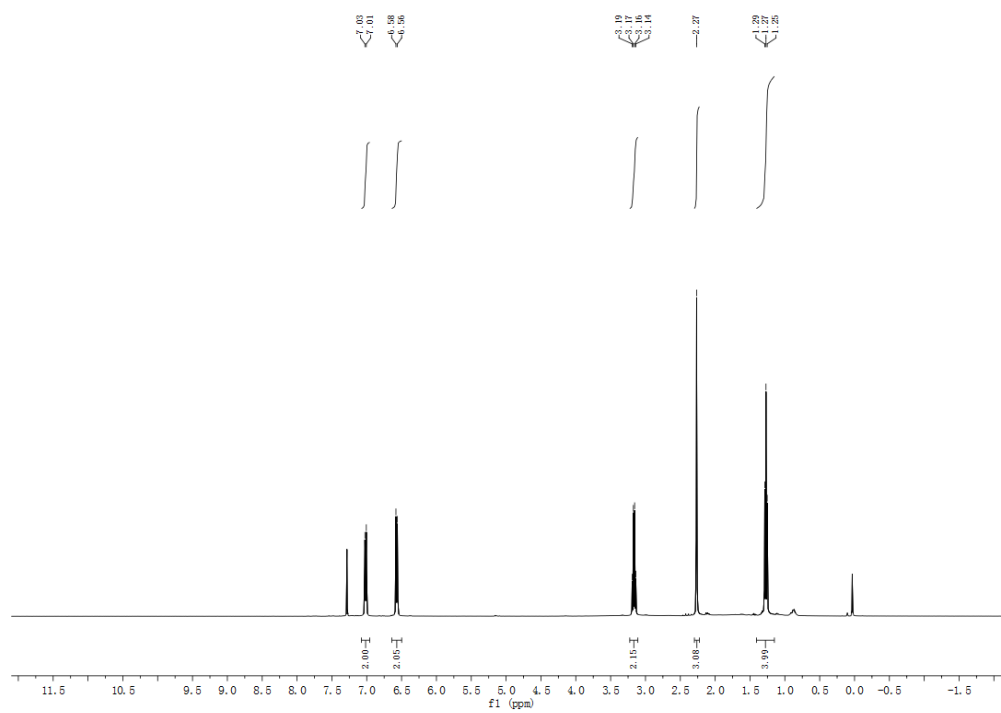

### $^{13}\text{C}$ NMR-spectra of **7d**

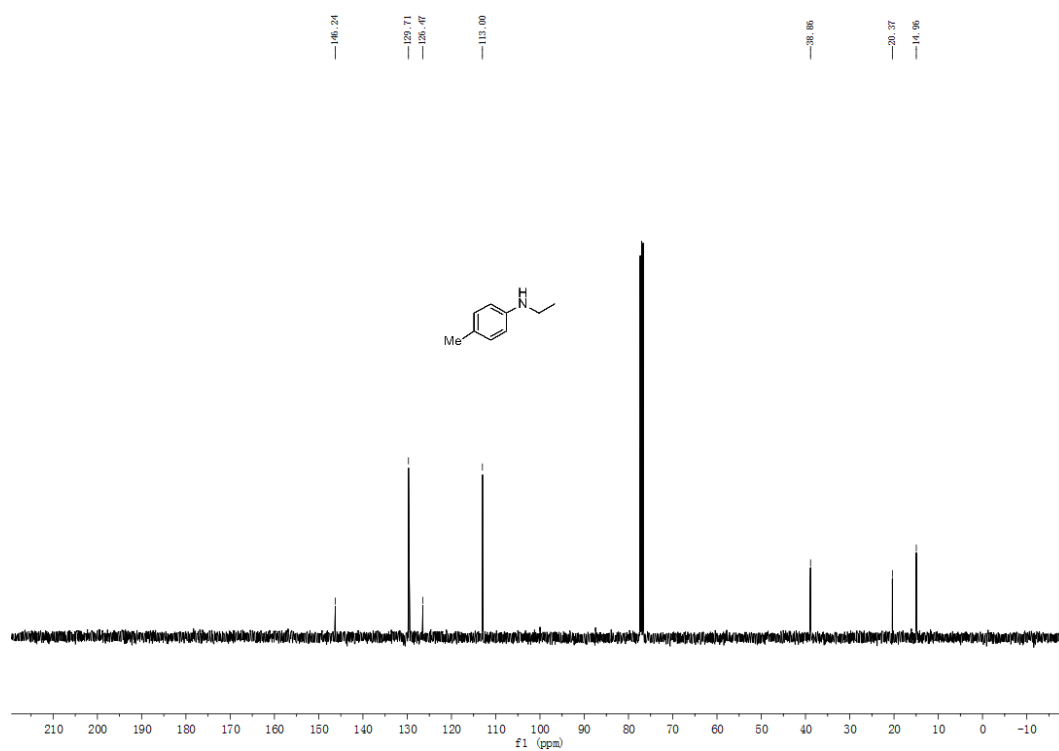

### $^1\text{H}$ NMR-spectra of **7e**

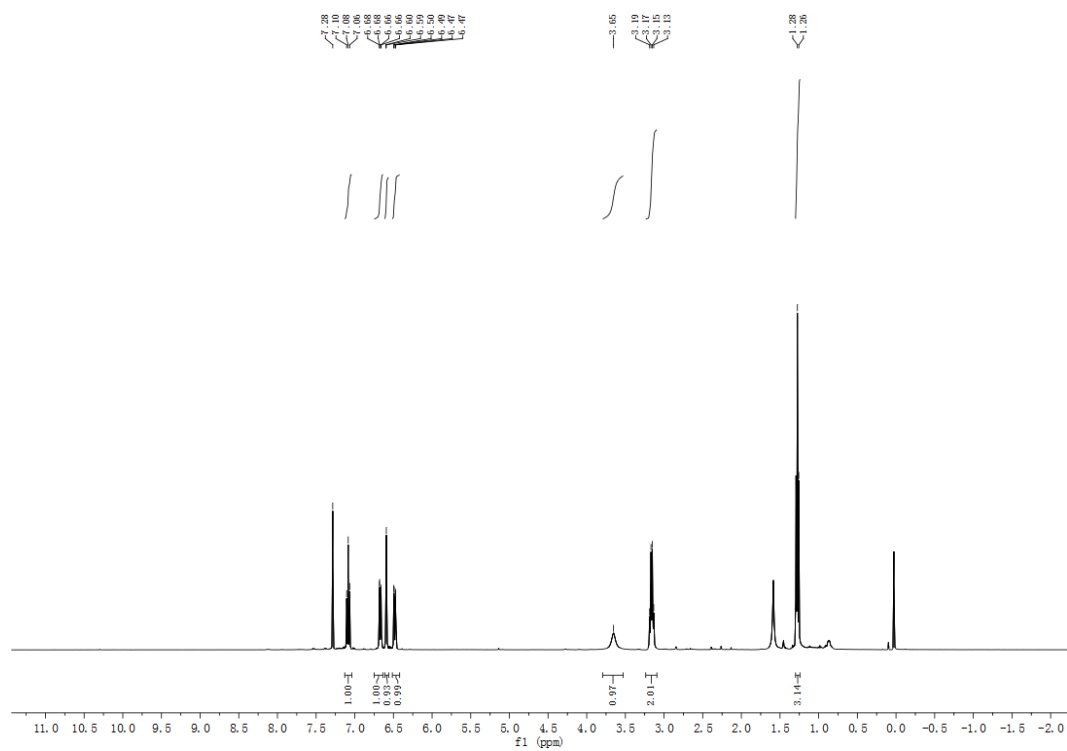

### <sup>13</sup>C NMR-spectra of 7e

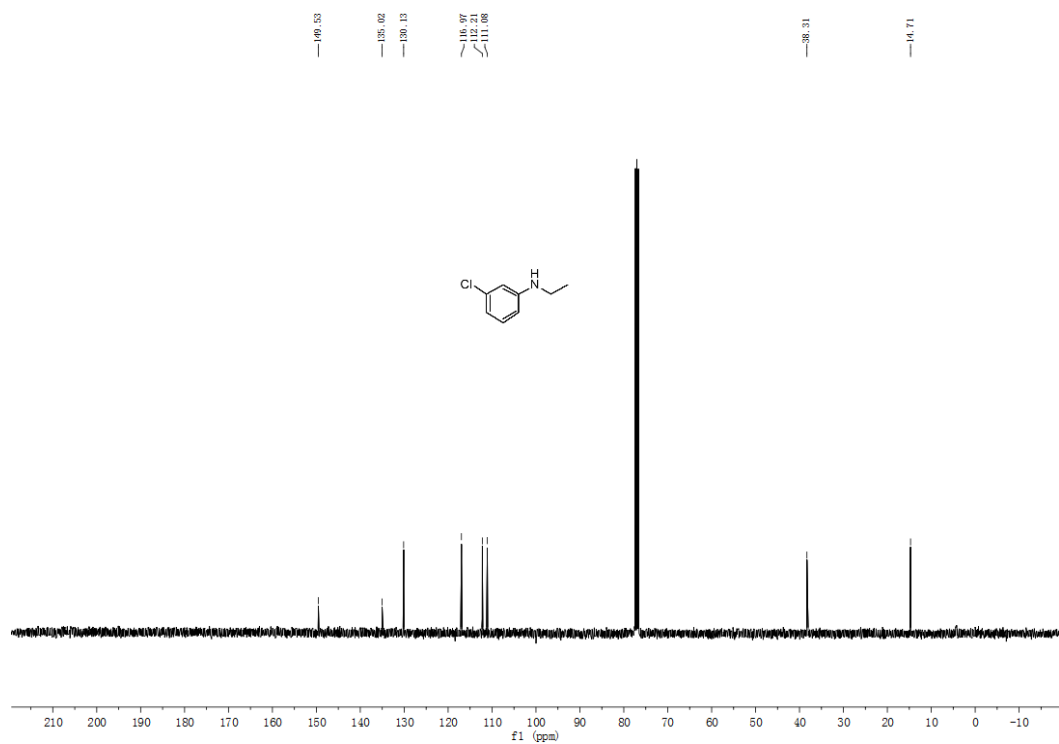

Supplement: c4ra06474g1.pdf [file c4ra06474g1.pdf]
